# INTERPRETING WIDE-BAND NEURAL ACTIVITY USING CONVOLUTIONAL NEURAL NETWORKS

**Markus Frey<sup>1,2,\*</sup>, Sander Tanni<sup>3</sup>, Catherine Perrodin<sup>4</sup>, Alice O'Leary<sup>3</sup>, Matthias Nau<sup>1,2</sup>, Jack Kelly<sup>5</sup>, Andrea Banino<sup>6</sup>, Daniel Bendor<sup>4</sup>, Christian F. Doeller<sup>1,2,7</sup>, and Caswell Barry<sup>3,7,\*</sup>**

<sup>1</sup>Kavli Institute for Systems Neuroscience, Centre for Neural Computation, The Egil and Pauline Braathen and Fred Kavli Centre for Cortical Microcircuits, NTNU, Norwegian University of Science and Technology, Trondheim, Norway

<sup>2</sup>Max-Planck-Institute for Human Cognitive and Brain Sciences, Leipzig, Germany

<sup>3</sup>Cell & Developmental Biology, UCL, London, United Kingdom

<sup>4</sup>Institute of Behavioural Neuroscience, UCL, London, United Kingdom

<sup>5</sup>Open Climate Fix, London, United Kingdom

<sup>6</sup>DeepMind, London, United Kingdom

<sup>7</sup>Joined senior authors

## ABSTRACT

Rapid progress in technologies such as calcium imaging and electrophysiology has seen a dramatic increase in the size and extent of neural recordings. Even so, interpretation of this data often depends on manual operations and requires considerable knowledge about the nature of the representation. Decoding provides a means to infer the information content of such recordings but typically requires highly processed data and prior knowledge of the encoding scheme. Here, we developed a deep-learning-framework able to decode sensory and behavioural variables directly from wide-band neural data. The network requires little user input and generalizes across stimuli, behaviours, brain regions, and recording techniques. Once trained, it can be analysed to determine elements of the neural code that are informative about a given variable. We validated this approach using data from rodent auditory cortex and hippocampus, identifying a novel representation of head direction encoded by putative CA1 interneurons.

## 1 INTRODUCTION

2 A central aim of neuroscience is deciphering the neural code, understanding the neural representa-  
3 tion of sensory features and behaviours, as well as the computations that link them. The task is  
4 complex, and although there have been notable successes - such as the identification of orienta-  
5 tion selectivity in V1 ([Hubel and Wiesel, 1959](#)) and the representation of self-location provided by  
6 hippocampal place cells ([O'Keefe and Dostrovsky, 1971](#)) - progress has been slow. Neural activity  
7 is high dimensional and often sparse, while the available datasets are typically incomplete, being  
8 both temporally and spatially limited. This problem is compounded by the fact that the code is  
9 multiplexed and functionally distributed ([Walker et al., 2011](#)). As such, activity in a single region may  
10 simultaneously represent multiple variables, to differing extents, across different elements of the  
11 neural population. Taking the entorhinal cortex for example, a typical electrophysiological recording  
12 might contain spike trains from distinct cells predominantly encoding head direction, self-location,  
13 and movement speed via their firing rates ([Sargolini et al., 2006](#); [Kropff et al., 2015](#); [Hafting et al.,  
14 2005](#)), while other neurons have more complex composite representations ([Hardcastle et al., 2017](#)).  
15 At the same time, information about speed and location can also be identified from the local field  
16 potential (LFP) ([McFarland et al., 1975](#)) and the relative timing of action potentials ([O'Keefe and  
17 Recce, 1993](#)). Fundamentally, although behavioural states and sensory stimuli can generally be  
18 considered to be low dimensional, finding the mapping between noisy neural representations and  
19 these less complex phenomena is far from trivial.

20 Historically, the approach for identifying the correspondence between neural data and external  
21 observable states – stimuli or behaviour – has been one of raw discovery. An experimenter, guided  
22 by existing knowledge, must recognise the fact that the activity covaries with some other factor.  
23 Necessarily this is an incremental process, favouring identification of the simplest and most robust  
24 representations, such as the sparse firing fields of place cells (Muller et al., 1987). Classical methods,  
25 like linear regression and linear-nonlinear-Poisson cascade models (Corrado et al., 2005; Kropff  
26 et al., 2015), provide powerful tools for the characterisation of existing representations but are  
27 less useful for the identification of novel responses - they typically require highly processed data  
28 in conjunction with strong assumptions about the neural response, and in the former cases are  
29 limited to one dimensional variables. Recent advances in machine learning suggest an alternative  
30 strategy. Artificial neural networks (ANNs) trained using error backpropagation regularly exceed  
31 human-level performance on tasks in which high dimensional data is mapped to lower dimensional  
32 labels (Krizhevsky et al., 2012; Mnih et al., 2015). Indeed, these tools have successfully been applied  
33 to *processed* neural data - accurately decoding behavioural variables from observed neural firing  
34 rates (Glaser et al., 2017; Tampuu et al., 2018). However, the true advantage of ANNs is not their  
35 impressive accuracy but rather the fact that they make few assumptions about the structure of  
36 the input data and, once trained, can be analysed to determine which elements of the input, or  
37 indeed combination of elements, are most informative (Cichy and Kaiser, 2019; Hasson et al., 2020;  
38 Cammarata et al., 2020). Moreover, this framework provides full control over the weights, activations,  
39 and objective functions of the model, allowing fine-grained analysis of the inner workings of the  
40 network. Viewed in this way ANNs potentially provide a means to accelerate the discovery of novel  
41 neural representations.

42 To test this proposal, we developed a convolutional network (LeCun et al., 2015) able to take min-  
43 imally processed, wide-band neural data as input and output predicted continuous regression  
44 variables. In the first instance, we trained the model with unfiltered and unclustered electrophysio-  
45 logical recordings made from the CA1 pyramidal cell layer in freely foraging rodents. As expected,  
46 the network accurately decoded the animals' location, speed, and head direction - without spike  
47 sorting or additional user input. Analysis of the trained network showed that it had 'discovered' place  
48 cells (O'Keefe and Dostrovsky, 1971; O'Keefe and Nadel, 1978) - frequency bands associated with  
49 pyramidal waveforms being highly informative about self-location (Epsztein et al., 2011). Equally,  
50 it successfully recognized that theta-band oscillations in the LFP were informative about running  
51 speed (McFarland et al., 1975; Jeewajee et al., 2008). Unexpectedly, the network also identified  
52 a population of putative CA1 interneurons that encoded information about head direction. We  
53 corroborated this observation using conventional tools, confirming that the firing rate of these  
54 neurons was modulated by facing-direction, a previously unreported relationship. Beyond this we  
55 found the trained network provided a means to efficiently conduct analyses which would otherwise  
56 have been complex or time consuming. For example, comparison of all frequency bands revealed  
57 positive interactions between frequencies associated with waveforms - components of the neural  
58 code that convey more information together than when considered individually. Subsequently, to  
59 demonstrate the generality of this approach, we applied the same architecture to electrophysio-  
60 logical data from auditory cortex as well as two-photon calcium imaging data (Stosiek et al., 2003)  
61 acquired while mice explored a virtual environment.

62 Our model differs markedly from conventional decoding methods which typically use Bayesian  
63 estimators (Zhang et al., 1998) in conjunction with highly processed neural data. In the case of  
64 extracellular recordings, this usually implies that time-series are filtered and processed to detect  
65 action potentials and assign them to specific neurons. Necessarily this discards information in

66 frequency bands outside of the spike range, potentially introducing biases implicit in the algorithm  
67 used (Pachitariu et al., 2016; Chung et al., 2017; Lee et al., 2017) and operator's subjective prefer-  
68 ences (Harris et al., 2000; Wood et al., 2004), and - despite considerable advances - still demands  
69 considerable manual input to adjust clusters (Pachitariu et al., 2016). Furthermore, accurate calcula-  
70 tion of prior expectations regarding the way in which the data varies with the decoded variable - an  
71 essential component of Bayesian decoding - requires considerable knowledge about the structure  
72 of the neural signal being studied and appropriate noise models. Other authors have attempted to  
73 address some of these shortcomings, for example, decoding without assigning action potentials to  
74 specific neurons (Kloosterman et al., 2013; Ackermann et al., 2019; Deng et al., 2015) or combining  
75 LFP and spiking data (Stavisky et al., 2015) for cursor control in patients. However, these approaches  
76 did not use wide-band unprocessed data and relied on existing assumptions about neural coding  
77 statistics, while their primary focus was simply to improve decoding accuracy. In contrast, the  
78 flexible, general-purpose approach we describe here requires few assumptions and - once trained  
79 - can be interrogated to inform the discovery of novel neural representations. In addition, as the  
80 model does not rely on specific oscillations or spike waveforms, it can easily generalize across  
81 domains - a fact we demonstrate with optical imaging data.

## 82 RESULTS

### 83 **Accurate decoding of self-location from CA1 recordings**

84 In the first instance we sought to evaluate our network-based decoding approach on well charac-  
85 terised neural data with a clear behavioural correlate. To this end we used as input extracellular  
86 electrophysiological signals recorded from hippocampal region CA1 in five freely moving rats - place  
87 cells from this area being noted for their spatially constrained firing fields that convey considerable  
88 information about an animals self-location (O'Keefe and Dostrovsky, 1971; Muller et al., 1987).  
89 Animals were bilaterally implanted with 32 tetrodes and, after recovery and screening, 128 channel  
90 wide-band (0Hz to 15000 Hz sampled at 30kHz) recordings were made while the rats foraged in a  
91 1.25 x 1.75m arena for approximately 40 minutes (see methods). Raw electrophysiological data  
92 were decomposed using Morlet wavelets to generate a three-dimensional representation depicting  
93 time, channels, and frequencies from 2Hz to 15000Hz (Figure 1A) (Torrence and Compo, 1998).  
94 Using the wavelet coefficients as inputs, the model was trained in a supervised-fashion using error  
95 backpropagation with the X and Y coordinates of the animal as regression targets.

96 To reduce computational load and improve test set generalisation we use 2D-convolutions with  
97 shared weights applied to the three-dimensional input (Figure 1B, Table S1) - the first eight convolu-  
98 tional layers having weights shared across channels and the final six across time. Implementing  
99 weight sharing in this way is desirable as the model is able to efficiently identify features that reoccur  
100 across time and channels, for example, prominent oscillations or waveforms, while also drastically  
101 reducing model complexity. For comparison, an equivalent architecture trained to decode position  
102 from 128 channels of hippocampal electrophysiological but without shared weights had 38,144,900  
103 hyperparameters compared to 5,299,653 - an increase of 720%. The more complex model took 4.7  
104 hours to run per epoch, as opposed to 175s, and ultimately yielded less accurate decoding (Figure  
105 S1).

106 The model accurately decoded position from the unprocessed neural data in all rats, providing a  
107 continuous estimate of location with an average error less than 10% of the environment's length.  
108 This demonstrates that, as expected, the network was able to identify informative signals in the raw  
109 neural data (Mean error 17.31cm  $\pm$  4.46cm; Median error 11.40cm  $\pm$  3.82cm; Chance level 65.03cm

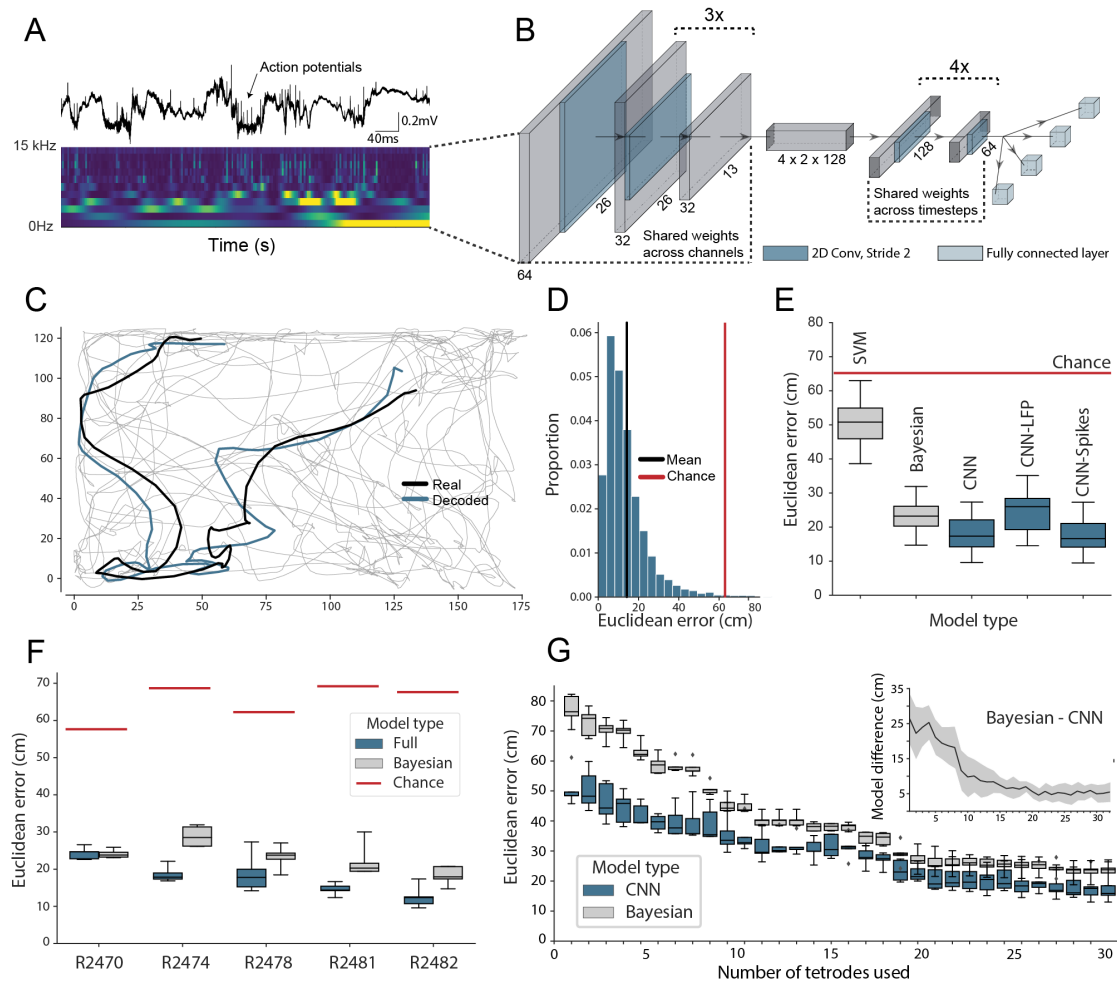

**Figure 1: Accurate decoding of self-location from unprocessed hippocampal recordings.** A) Top, a typical 'raw' extracellular recording from a single CA1 electrode. Bottom, wavelet decomposition of the same data, power shown for frequency bands from 2Hz to 15kHz (bottom to top row). B) At each timestep wavelet coefficients (64 time points, 26 frequency bands, 128 channels) were fed to a deep network consisting of 2D convolutional layers with shared weights, followed by a fully-connected layer with a regression head to decode self-location; schematic of architecture shown. C) Example trajectory from R2478, true position (black) and decoded position (blue) shown for 3s of data. Full test-set shown in Video 1. D) Distribution of decoding errors from trial shown in (C), mean error (14.2cm ± 12.9cm, black), chance decoding of self-location from shuffled data (62.2cm ± 9.09cm, red). E) Across all five rats, the network (CNN) was more accurate than a machine learning baseline (SVM) and a Bayesian decoder (Bayesian) trained on action potentials. This was also true when the network was limited to high frequency components (>250Hz, CNN-Spikes). When only local frequencies were used (<250Hz, CNN-LFP), network performance dropped to the level of the Bayesian decoder (distributions show the five-fold cross validated performance across each of five animals, n=25). F) Decoding accuracy for individual animals, the network outperformed the Bayesian decoder in all cases. An overview of the performance of all tested models can be seen in Figure S2. G) The advantage of the network over the Bayesian decoder increased when the available data was reduced by downsampling the number of channels (data from R2478). Inset shows the difference between the two methods.

110  $\pm 6.91\text{cm}$ ; Figure 1C,D). To provide a familiar benchmark, we applied a standard Bayesian decoder  
111 with a continuity prior (Zhang et al., 1998; Ólafsdóttir et al., 2015) to the spiking data from the same  
112 datasets (see methods). To this end, action potentials were identified, clustered, manually curated,  
113 and spike time vectors were used to decode location - data contained in the local field potential  
114 (LFP) was discarded. Notably our CNN approach was consistently more accurate than the Bayesian  
115 decoder, exceeding its performance in all animals (Bayesian mean error  $23.38\text{cm} \pm 4.35\text{cm}$ ; network  
116 error  $17.31\text{cm} \pm 4.46\text{cm}$ ; Wilcoxon signed-rank test:  $T=18$ ,  $p=0.0001$ ). Similarly, to compare the CNN  
117 against standard machine learning tools we used the wavelet transformed data to train support  
118 vector machines (SVMs). Note that in this case the spatial structure of the input is inevitably lost  
119 as the input features are transformed to a one-dimensional representation. Both linear ( $53.6\text{cm} \pm$   
120  $14.77\text{cm}$ ; Figure 1E) and non-linear SVMs ( $61.2\text{cm} \pm 15.67\text{cm}$ ) performed worse than the CNN.

121 The relative advantage over the Bayesian decoder increased further when the number of channels  
122 used for decoding was downsampled to simulate smaller recordings (linear regression Wald-test  
123 ( $n=31$ ),  $s=-0.65$ ,  $p=1.83\text{e-}10$ ; Figure 1G). Notably, the model achieved a similar decoding performance  
124 with twenty tetrodes (80 channels,  $23.45\text{cm} \pm 3.15\text{cm}$ ) as the Bayesian decoder reached with the  
125 full data set (128 channels,  $23.25\text{cm} \pm 2.79\text{cm}$ , Figure 1G). The high accuracy and efficiency of the  
126 model suggest that the CNN utilizes additional information contained in the LFP as well as from  
127 sub-threshold spikes and those that were not successfully clustered. Note that while the Bayesian  
128 decoder explicitly incorporates information about the animals' positions at previous timesteps and  
129 probability with which each spatial location is visited, our model is effectively feed-forward - being  
130 presented with  $\tilde{2}$ s windows of data.

131 To better understand which elements of the raw neural data the network used, we retrained our  
132 model using datasets limited to just the LFP ( $<250\text{Hz}$ ) and just the spiking data ( $>250\text{Hz}$ ). In both  
133 cases, the network accurately decoded location (spikes-only (CNN-Spikes) mean error  $17.23\text{cm} \pm$   
134  $4.69\text{cm}$ ; LFP-only (CNN-LFP) mean error  $24.24\text{cm} \pm 6.00\text{cm}$ ; Figure 1E), indicating that this framework  
135 is able to extract information from varied electrophysiological sources. Consistent with the higher  
136 information content of action potentials, the spikes-only network was considerably more accurate  
137 than the LFP-only network (Wilcoxon signed-rank test, two-sided ( $n=25$ ):  $T=0$ ,  $p=1.22\text{e-}05$ ), although  
138 the LFP-only network was still comparable with the spike-based Bayesian decoder (Bayesian  $23.38\text{cm}$   
139  $\pm 4.35\text{cm}$ ; LFP  $24.24\text{cm} \pm 6.00\text{cm}$ ; Wilcoxon signed-rank test, two-sided ( $n=25$ ):  $T=136$ ,  $p=0.475$ ).  
140 Note that previous studies have shown that demodulated theta is informative about the position of  
141 an animal in its environment (Agarwal et al., 2014). However, in those experiments theta oscillations  
142 were converted into a complex-valued signal, which carried both the magnitude and phase of theta  
143 - here we only used the magnitude for decoding of position.

#### 144 **Simultaneous decoding of multiple factors**

145 The hippocampal representation of self-location is arguably one of the most readily identifiable  
146 neural codes - at any instance a small number of sparsely active neurons are highly informative. To  
147 provide a more stringent test of the network's ability to detect and decode behavioural variables  
148 from unprocessed neural signals, we retrained with the same data but simultaneously decoded  
149 position, speed, and head-direction within a single model. CA1 recordings are known to incorporate  
150 information about these additional factors but their representation is less pronounced than that  
151 for self-location. Thus, the spatial activity of place cells is known to be weakly modulated by head  
152 direction (Jercog et al., 2019; Yoganarasimha et al., 2006), while place cell firing rates and both  
153 the frequency and amplitude of theta, a 7-10Hz LFP oscillation, are modulated by running speed  
154 (McFarland et al., 1975; Jeewajee et al., 2008). In this more complex scenario the architecture and



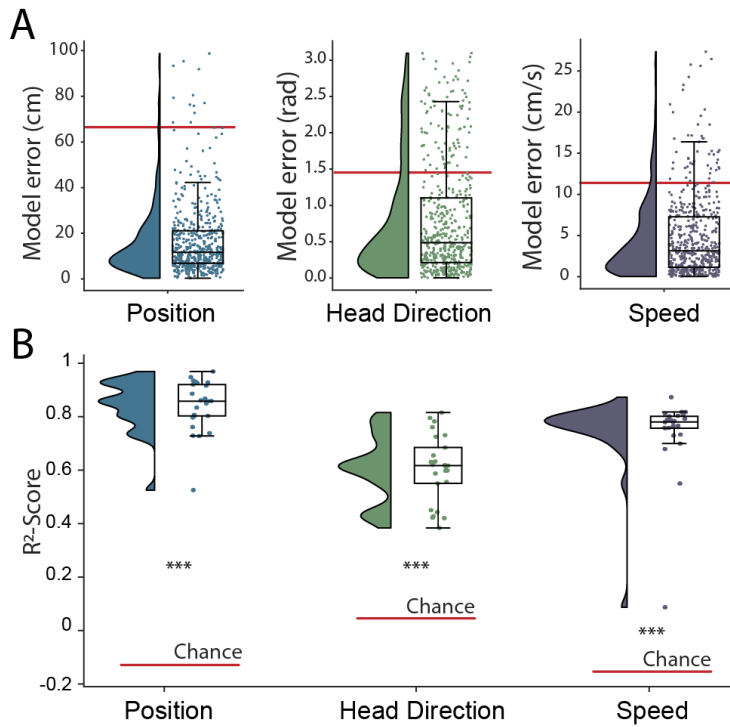

**Figure 2: Simultaneous decoding of multiple variables from hippocampal data.**

A) Position, head direction, and running speed were accurately decoded in concert by a single network. Data from all five animals, each point indicates an error for a single sample. The red dashed line indicates the chance level obtained by shuffling the input relative to the output while fully retraining the model.

B)  $R^2$ -scores, a loss-invariant measure of model performance - ranging from 1 (perfect decoding) to negative infinity - allowing performance to be compared between dissimilar variables. Data as in (A), each point corresponds to one of five cross-validations within each of five rats.

155 hyper-parameters remained the same with just the final fully connected layer of the network being  
156 replicated, one layer for each variable, with the provision of appropriate loss functions - cyclical  
157 mean absolute error for head direction and mean absolute error for speed (see Methods). All  
158 three variables were decoded simultaneously and accurately (Position,  $17.78\text{cm} \pm 4.96\text{cm}$ ; Head  
159 Direction,  $0.80\text{rad} \pm 0.18\text{rad}$ ; Speed  $4.94\text{cm/s} \pm 1.00\text{cm/s}$ ; Figure 2A & **Video 1**), with no meaningful  
160 decrement in performance relative to the simpler network decoding only position (position-only  
161 model  $17.31\text{cm} \pm 4.46$ ; combined model  $17.78\text{cm} \pm 4.96\text{cm}$ ; Wilcoxon signed-rank test two-sided  
162 ( $n=25$ ):  $T=116$ ,  $p=0.2108$ ). Indeed, comparison of the  $R^2$ -score metric from the fully trained network  
163 - a measure which represents the portion of variance explained and is independent of the loss  
164 function - indicated that mean decoding performance was above chance for all three behaviours  
165 ( $R^2$ -score Position  $0.86 \pm 0.08$ , Head Direction  $0.60 \pm 0.12$ , Speed  $0.72 \pm 0.14$ , Chance  $R^2$ -score  
166 Position  $-0.14 \pm 0.13$ , Head Direction  $0.04 \pm 0.11$ , Speed  $-0.16 \pm 0.22$ ) (Figure 2B). Thus, the network  
167 was able to effectively access multiplexed information embedded in minimally processed neural  
168 data.

### 169 Interrogation of electrophysiological recordings

170 Although the network supports accurate decoding of self-location from electrophysiological data,  
171 this was not our main aim. Indeed, our primary goal for this framework was to provide a flexible tool  
172 capable of discovering and characterising sensory and behavioural variables represented in neural  
173 data - providing insight about the form and content of encoded information. To this end, in the fully  
174 trained network, we used a shuffling procedure to estimate the influence that each element of the  
175 3D input (frequencies x channel x time) had on the accuracy of the decoded variables (see Methods).  
176 Since this approach does not require retraining it provides a rapid and computationally efficient  
177 means of assessing the contribution made by different channels, frequency bands, and time points.  
178 Turning first to position decoding, we saw that the adjacent 469Hz and 663Hz frequency bands were

179 by far the most influential - together accounting for more than 42% of the information about self-  
180 location derived from the electrophysiological data (Figure 3A). Since these recordings were made  
181 from CA1, we hypothesized that these frequencies corresponded to place cell action potentials.  
182 To confirm this hypothesis - and demonstrate that it was possible to objectively use this network-  
183 based approach to identify the neural basis of decoded signals - we applied the following approach  
184 (see Methods): First, we isolated the waveforms of place cells (n=629) and putative interneurons  
185 (n=91) in all animals, which were identified using a conventional approach (Pachitariu et al., 2016;  
186 Klausberger et al., 2003; Csicsvari et al., 1999). Second, for these two groups, we calculated the  
187 relative representation of the 26 frequency bands in their waveforms. We found that the highly  
188 informative 469Hz and 663Hz bands were the dominant components of place cell action potentials  
189 and that in general the power spectra of these spikes strongly resembled the frequency influence  
190 plot for position decoding (Spearman rank-order correlation, two-sided (n=26)  $\rho=0.84$ ,  $p=7.63e-08$ ;  
191 Figure 3B). In contrast, putative interneurons - which typically have a shorter after-hyperpolarisation  
192 than place cells (English et al., 2017) - were characterised by higher frequency components (Figure  
193 3B, Mann-Whitney rank test interneuron (n=91) vs. place cell (n=629),  $U=1009.5$ ,  $p=2.47e-13$ ), with  
194 the highest power at 5304Hz and 3750Hz, bands that were considerably less informative about  
195 self-location (Figure 3A).

196 Since the frequencies associated with place cell waveforms were the most informative, this indicated  
197 that the network had correctly identified place cells as the primary source of spatial information  
198 in these recordings. To corroborate this, we used the same data and for each channel eliminated  
199 power in the 469Hz and 663Hz frequency bands at time points corresponding to either place cell  
200 or interneuron action potentials. As expected, position decoding was most strongly affected by  
201 removal of the place cell time points (Mann-Whitney-U-Test (n=629 place cells, n=91 interneurons):  
202  $U=1497$ ,  $p=2.86e-08$ ; Figure 3C). Using the same shuffling method we also analysed how informative  
203 each channel was about self-location (Figure S3). In particular, we found that the number of place  
204 cells identified on a tetrode from the spike sorted data was highly correlated with the tetrode's  
205 spatial influence (Spearman rank-order correlation (n=128)  $\rho=0.71$ ,  $p=5.11e-06$ ) and that the overall  
206 distribution of both number of place cells and spatial influence followed a log-normal distribution  
207 (Shapiro-Wilk test on log-transformed data, number of place cells,  $W=0.79$ ,  $p=3.59e-05$ ; tetrode  
208 influence  $W=0.59$ ,  $p=3.04e-08$ ; Figure S3B). In sum, this analysis correctly identified that the firing  
209 rates of both place cells and putative interneurons are informative about an animal's location, place  
210 cells more so than interneurons (Wilent and Nitz, 2007). The analysis also highlighted the spatial  
211 activity of place cells, pointing to the stable place fields as a key source of spatial information.

212 A potential concern is that our approach might not identify multiple frequency bands if the in-  
213 formation they contain is mutually redundant. The previous example, in which place cells and  
214 putative interneurons were both found to be informative about self-location, demonstrates this  
215 is not entirely the case. However, to further exclude this possibility we compared the influential  
216 frequencies identified from our complete model with models trained on just a single frequency band  
217 at a time. Specifically, twenty-six models were trained, one for each frequency - the performance  
218 of each of these models being taken as an indication of the information present in that band. As  
219 expected we found both methods identified similar frequencies as indicated by a high correlation  
220 between our influence measure and the performance of single frequency band models (Position,  
221 Spearman rank-order correlation (n=26)  $\rho=0.88$ ,  $p<0.001$ ; Head Direction,  $\rho=0.82$ ,  $p<0.001$ ; Speed,  
222  $\rho=0.47$ ,  $p=0.02$ , Figure S4). Note that, although each model was individually faster to train than the  
223 complete model, the time to train all 26 was considerably longer than the single model applied  
224 simultaneously to all frequencies (51.2 hours vs. 8.6 hours, 6x faster). Thus our combined approach

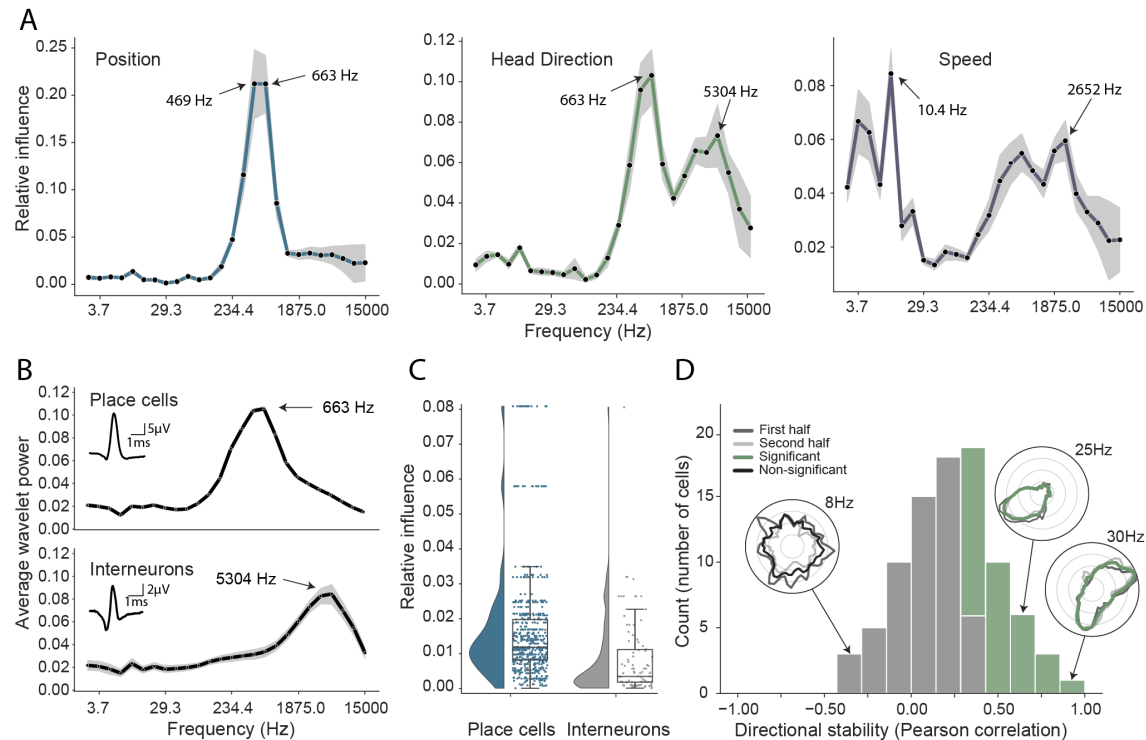

**Figure 3: Analysis of trained network identifies informative elements of the neural code.**

(A) A shuffling procedure was used to determine the relative influence of different frequency bands in the network input. Left, the 469Hz and 663Hz components - corresponding to place cell action potentials - were highly informative about animals' positions. Middle, both place cells and putative interneurons (5304Hz) carried information about head direction. Right, several frequency bands were informative about running speed, including those associated with the LFP (10.4Hz) and action potentials. Data from all animals. (B) Wavelet coefficients of place cell (top) and interneuron (bottom) waveforms are distinct and correspond to frequencies identified in A. Inset, average waveforms. Data from all animals. (C) Frequency bands associated with place cells (469 & 663Hz) were more informative about position than those associated with putative interneurons (5304 Hz) - their elimination produced a larger decrement in decoding performance ( $p < 0.001$ ). Data from all animals. (D) A subset of putative CA1 interneurons encodes head direction. 33/91 interneurons from five animals exhibited pronounced directional modulation that was stable throughout the recording (green). Depth of modulation quantified using Kullback-Leibler divergence vs. uniform circle. Stability assessed with the Pearson correlation between polar ratemaps from the first and second half of each trial (dark grey and light grey). Cells with  $p < 0.01$  for both measures were considered to be reliably modulated by head direction. Inset, example polar ratemaps. Data from all animals.

225 provides a fair and efficient means to determine the informative elements of wide-band neural data.  
 226 More importantly, analyses of the full network enables multiple frequency bands to be considered  
 227 in-concert, providing a means to identify interactions (e.g. Figure S5) that are not accessible to  
 228 standard single-frequency methods.

### 229 CA1 interneurons are modulated by head direction

230 Next, having validated our approach for spatial decoding, we examined the basis upon which the  
 231 network was able to decode head direction. Although place cells primarily provide an allocentric  
 232 spatial code, their infield firing rate is known to be modulated by heading direction (Muller et al.,  
 233 1994; Rubin et al., 2014). Consistent with the presence of this directional code, we again saw  
 234 that the most influential frequencies for head direction decoding were those associated with  
 235 place cells (469Hz and 663Hz; Figure 3A). However, the distribution also incorporated a secondary  
 236 peak corresponding to the frequencies typical for interneuron waveforms (Spearman rank-order  
 237 correlation ( $n=26$ )  $\rho=0.76$ ,  $p=5.71 \times 10^{-6}$ , Fig 3AB). Presubicular interneurons have been shown to be



238 modulated by both head direction and angular velocity (Preston-Ferrer et al., 2016) but to the best of  
239 our knowledge no similar responses have been noted in CA1. To establish if putative interneurons  
240 conveyed information about head direction we again used an 'elimination' analysis on data from all  
241 five animals - the two frequency bands most strongly associated with interneurons (3750Hz and  
242 5304Hz) were scrambled at time points when interneuron spikes were present. Consistent with the  
243 influence plots, we found that selectively eliminating putative interneurons degraded the accuracy  
244 with which head direction was decoded (relative influence:  $0.089 \pm 0.043$ , two-sided t-test ( $n=91$ )  
245  $t=4.16$ ,  $p=0.014$ ). As a final step, to verify this novel observation we reverted to a standard approach.  
246 Specifically, we calculated the directional ratemap for each interneuron using only periods when the  
247 animal was in motion ( $>10\text{cm/s}$ ), determined the Kullback-Leibler divergence vs. a uniform circle  
248 (Doeller et al., 2010), and applied a shuffling procedure to determine significance - as a whole the  
249 population exhibited reliable but weak modulation of interneuronal firing rate by head direction  
250 (Kullback-Leibler Divergence ( $n=91$ ):  $0.0067 \pm 0.009$ ) with 58.2% (53/91) of cells being individually  
251 significant ( $p<0.01$ ). Behaviours that are inhomogeneously distributed or confounded can result  
252 in spurious neural correlates (Muller et al., 1994). To control for this possibility we repeated the  
253 analysis using only data from the centre of the environment ( $>25\text{cm}$  from the long sides of the  
254 enclosure and  $>20\text{cm}$  from the short sides). Additionally, to verify stability, we controlled that  
255 ratemaps generated from the first and second half of the trial were correlated (Pearson correlation,  
256  $p<0.01$ ). Under this more rigorous analysis, we confirmed that a sub-population (36.2%, 33/91) of  
257 putative hippocampal interneurons were modulated by head direction, a previously unrecognised  
258 spatial correlate (Figure 3D).

#### 259 **Multiple electrophysiological features contribute to the decoding of speed**

260 The frequency influence plots for running speed also showed several local peaks (Figure 3A), that  
261 in all cases corresponded to established neural correlates. In rodents, theta frequency and power  
262 are well known to co-vary almost linearly with running speed (McFarland et al., 1975; Jeewajee  
263 et al., 2008), accordingly analysis of the network identified the 10.4Hz frequency band as the most  
264 influential. Similarly, the firing rate of place cells increases with speed, an effect captured by the  
265 peak at 663Hz. Interestingly a clear peak is also evident at 2652Hz, indicating that interneuron  
266 firing rates are also informative - originating either from CA1 speed cells (Góis and Tort, 2018)  
267 or from theta-locked interneurons (Huh et al., 2016). Finally, a 4th peak was evident at 3.66Hz  
268 and 5.17Hz, a range that corresponds to type 2 ('atropine sensitive') theta which is present during  
269 immobility (Kramis et al., 1975; Sainsbury et al., 1987). To corroborate this conclusion, we calculated  
270 the correlation between power in each frequency band and running speed (Figure S6A), confirming  
271 that the latter band showed the expected negative correlation - higher power at low speeds - while  
272 the other three peaks were positively correlated.

#### 273 **Generalization across brain regions and recording techniques**

274 As a final step, we sought to determine how well our approach generalised to other recording  
275 techniques and brain areas. Addressing the latter point first, we trained the network using electro-  
276 physiological recordings (64 channels) from the primary auditory cortex of a freely-moving mouse  
277 while pure tone auditory stimuli (4 to 64kHz, duration 200 ms) were played from a speaker (Figure  
278 4A). As above, the raw electrophysiological data was transformed to the frequency domain using  
279 Morlet wavelets and this wide-band frequency representation was used as input. The model archi-  
280 tecture and hyperparameters were kept the same, reducing only the number of down-sampling  
281 steps because of the smaller input size (64 channels vs. 128 channels for CA1 recordings - each down-

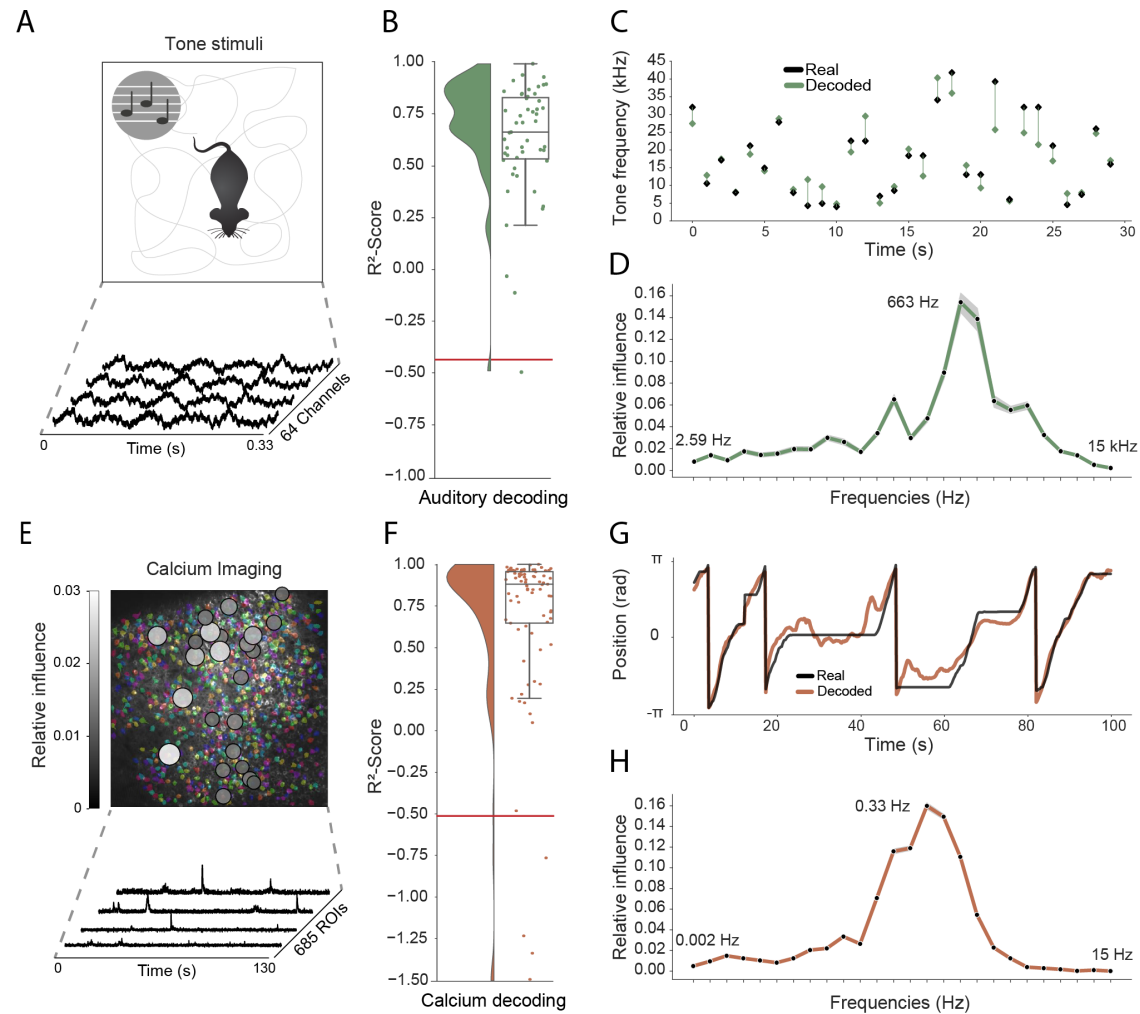

**Figure 4: Model generalizes across recording techniques and brain regions**

(A) Overview of auditory recording. We recorded electrophysiological signals while the mouse is freely moving inside a small enclosure and is presented with pure tone stimuli ranging from 4kHz to 64kHz. (B)  $R^2$ -score for decoding of frequency tone from auditory cortex ( $0.73 \pm 0.08$ ). Each dot describes the  $R^2$ -score for a 5s sample of the experiment. Chance level is indicated by the red line. (C) An example section for decoding of auditory tone frequencies from auditory electrophysiological recordings, real tone colored in black, decoded tone in green, the line between real and decoded indicates magnitude of error. (D) Influence plots for decoding of auditory tone stimuli, same method as used for CA1 recordings. (E) Calcium recordings from a mouse running on a linear track in VR. We record from 685 cells and use Suite2p to preprocess the raw images and extract calcium traces which we feed through the model to decode linear position. Overlay shows relative influence for decoding of position calculated for each putative cell. (F)  $R^2$ -score for decoding of linear position from two-photon CA1 recordings ( $0.90 \pm 0.03$ ). Each dot describes the  $R^2$ -score for a 5s sample of the experiment. Chance level is indicated by the red line. (G) Example trajectory through the virtual linear track (linearized to  $[-\pi, \pi]$ ) with real position (black) and decoded position (orange). (H) Influence plots for decoding of position from two-photon calcium imaging. Note that the range of frequencies is between 0Hz and 15Hz as the sampling rate of the calcium traces is 30Hz.

282 sampling layer halves the number of units in previous layer). The auditory stimuli - training target -  
283 was modelled as a continuous variable with '-1' indicating no tone present and the log-transformed  
284 frequency of the sound at all other time points. As expected, this model architecture was also able  
285 to accurately decode tone stimuli from auditory cortex ( $R^2$ -scores of  $0.734 \pm 0.080$ , chance model:  
286  $-0.432 \pm 0.682$ , Figure 4B,C). Informative frequencies were concentrated around 663Hz and 165Hz,  
287 indicating that information content about tone stimuli comes mostly from pyramidal cell activity.

288 Having shown that the model generalises across different brain areas we wanted to further investi-  
289 gate if it generalizes across different recording techniques. Therefore, in the third set of experiments  
290 we acquired two-photon calcium fluorescence data from mouse CA1 while the head-fixed animal  
291 explored a 230cm virtual track. Raw data was preprocessed to generate denoised activity traces  
292 for putative cells ( $n=685$  regions of interest), these were then decomposed to a frequency repre-  
293 sentation using the same wavelet approach as before - only frequency bands between 0Hz and  
294 15Hz being used because of the lower data rate (30Hz) (see methods, Figure 5E). As before, wavelet  
295 coefficients were provided to the network as input and the only change was an increase in the  
296 number of down-sampling steps to account for the large number of ROIs (685 ROIs vs 128 channels  
297 for CA1 recordings). The network was able to accurately decode the animal's position on the track  
298 (mean error:  $15.87 \pm 16.33$  cm,  $R^2$ -scores of  $0.90 \pm 0.03$  vs. chance model  $-0.05 \pm 0.127$ , Figure 4F,G).  
299 Using the same shuffling technique as before, we generated influence plots indicating the relative  
300 information provided by putative cells (Fig 4E) and frequencies (Fig 4H) . In the frequency domain,  
301 the most informative bands were 0.33Hz and 0.46Hz, unsurprisingly mirroring the 1s to 2s decay  
302 time of GCaMP6s (Chen et al., 2013). Interestingly the relative information content of individual cells  
303 was highly heterogeneous, a small subset (18.2%) of cells accounted for half (50%) of the influence -  
304 these units being distributed across the field of view with no discernible pattern (Figure 4E).

## 305 DISCUSSION

306 The neural code provides a complex, non-linear representation of stimuli, behaviours, and cognitive  
307 states. Reading this code is one of the primary goals of neuroscience - promising to provide insights  
308 into the computations performed by neural circuits. However, decoding is a non-trivial problem,  
309 requiring strong prior knowledge about the variables encoded and, crucially, the form in which they  
310 are represented. Not only is this information often incomplete or absent but a full characterisation  
311 of the neural code is precisely the question we seek to solve. Addressing these limitations, we  
312 investigated the potential of a deep-learning framework to decode behaviours and stimuli from  
313 wide-band, minimally processed neural activity. To this end, we designed a model architecture  
314 using simple 2D convolutions with shared weights, omitting recurrent layers (Bai et al., 2018).  
315 These intentional design choices resulted in a fast, data efficient architecture that could be easily  
316 interpreted to discover which elements of the neural code provided information about specific  
317 variables - a decrease in network performance was accepted as a trade-off. We showed that this  
318 approach generalised well across brain regions and recording techniques capturing both spatial and  
319 temporal information in the signal, the only changes necessary to the network being adjustments  
320 to handle the number of channels in the input matrix.

321 In the first instance we validated our model using the well characterised spatial representations of  
322 rodent CA1 place cells. Decoding performance amply exceeded a Bayesian framework, as well as  
323 a standard machine learning approach that proved ineffective on the non-linear representation  
324 of self-location. Importantly, simple analyses of the trained network correctly indicated that place  
325 cell action potentials were the most informative spatial signal - confirming that this tool can deliver

326 insights into the nature of the neural code. In a further set of experiments we showed that the  
327 network was able to concurrently identify multiple representations of head direction and running  
328 speed, including several that were only recently reported and one - interneuron encoding of head  
329 direction - that was previously unreported. Importantly, this framework can also identify interactions  
330 between frequency components, an analysis that is intractable to conventional methods which  
331 consider features independently. Finally, we demonstrated the flexibility of this approach, applying  
332 the same network and hyper-parameters, with adjustments made only to the input and output  
333 layers, to two-photon calcium data and extracellular recordings from auditory cortex.

334 In sum, we believe deep-learning based frameworks such as this constitute a valuable tool for  
335 experimental neuroscientists, being able to provide a general overview as to whether a variable  
336 is encoded in time-series data and also providing detailed information about the nature of that  
337 encoding - when, where, and in what frequency bands it is present. That is not to say that this  
338 approach is a complete substitute for conventional analyses - it merely constrains the search space  
339 for variables that might be present and their plausible format. Indeed, we imagine this network  
340 might be best used as a first pass analysis, followed by conventional approaches to determine  
341 explicitly if a variable is present - much as we did for the interneuron representation of head  
342 direction. While we tested the network with optical and electrophysiological data it is highly likely  
343 that it will perform well with neural data acquired in most experimental settings, including fMRI,  
344 EEG, and MEG.

## 345 METHODS

### 346 **Tetrode recordings from CA1**

347 Five male Lister Hooded rats were used for this study. All procedures were approved by the UK Home  
348 Office, subject to the restrictions and provisions contained in the Animals Scientific Procedures Act  
349 of 1986. All rats (333-386 g/13-17 weeks old at implantation) were implanted with two single-screw  
350 microdrives (Axona Ltd.) targeted to the right and left CA1 (ML: 2.5 mm, AP: 3.8 mm posterior to  
351 bregma, DV: 1.6 mm from dura). Each microdrive was assembled with two 32 channel Omnetics  
352 connectors (A79026-001) and 16 eight tetrodes of twisted wires (either 17  $\mu\text{m}$  H HL coated platinum  
353 iridium, 90% and 10% respectively, or 12.7  $\mu\text{m}$  HM-L coated Stablohm 650; California Fine Wire),  
354 platinum plated to reduce impedance to below 150 k $\Omega$  at 1 kHz (NanoZ). After surgery, rats were  
355 housed individually on a 12 hr light/dark cycle and after one week of recovery rats were maintained  
356 at 90% of free-feeding weight with ad libitum access to water.

357 Screening was performed from one week after surgery. Electrophysiological data was acquired  
358 using Open Ephys recording system (Siegle et al., 2017) and a 64-channel amplifier board per drive  
359 (Intan RHD2164). Positional tracking performed using a Raspberry Pi with Camera Module V2  
360 (synchronised to Open Ephys system) and custom software, that localised two different brightness  
361 infra-red LEDs attached to amplifier boards on camera images acquired at 30 Hz. During successive  
362 recording sessions in a separate screening environment 1.4 x 1.4 m the tetrodes were gradually  
363 advanced in 62.5  $\mu\text{m}$  steps until place cells were identified. During the screening session, the animals  
364 were often being trained in a spatial navigation task for projects outside the scope of this study.

365 The experiments were run during the animals' dark period of the L/D cycle. The recording sessions  
366 used in this study were around 40 min long, depending on the spatial sampling of the animal,  
367 in a rectangular environment of 1.75 x 1.25 m, on the second, third or fourth exposure, varying  
368 between animals. The environment floor was black vinyl flooring, it was constructed of 60 cm

369 high boundaries (MDF) colored matt black, surrounded by black curtains on the sides and above.  
370 There was one large cue card raised above the boundary and two smaller cue cards distributed on  
371 the side of the boundary. Foraging was encouraged with 20 mg chocolate-flavoured pellets (LBS  
372 Biotechnology) dropped into the environment by custom automated devices. The recordings used  
373 in this study were part of a longer session that involved foraging in multiple other different size  
374 open field environments.

375 Rats were anaesthetised with isoflurane and given intraperitoneal injection of Euthanal (sodium  
376 pentobarbital) overdose (0.5 ml / 100 g) after which they were transcardially perfused with saline,  
377 followed by a 10% Formalin solution. Brains were removed and stored in 10% Formalin and 30%  
378 Sucrose solution for 3-4 days prior to sectioning. Subsequently, 50  $\mu$ m frozen coronal sections were  
379 cut using a cryostat, mounted on gelatine coated or positively charged glass slides, stained with  
380 cresyl violet and cleared with clearing agent (Histo-Clear II), before covering with DPX and coverslips.  
381 Sections were then inspected using Olympus microscope and tetrode tracks reaching into CA1  
382 pyramidal cell layer were verified.

383 Putative interneurons were classified based on waveform shape, minimum firing rate across multiple  
384 environments and lack of spatial stability. Specifically, classified interneurons had waveform half-  
385 width less than 0.15 ms, maximum ratio of amplitude to trough of 0.4, minimum firing rate of 4  
386 Hz and maximal 0.75 spatial correlation of ratemaps from first and last half of the recording in  
387 any environment (Klausberger et al., 2003; Csicsvari et al., 1999). Note that we used the spatial  
388 stability in order to differentiate interneurons from place cells or grid cells, with no influence on the  
389 directional stability of the head direction cell analysis.

### 390 **Calcium recordings from CA1**

391 All procedures were conducted in accordance to UK Home Office regulations.

392 One GCaMP6f mouse (C57BL/6J-Tg(Thy1-GCaMP6f)GP5.17Dkim/J, Jacksons) was implanted with an  
393 imaging cannula (a 3mm diameter x 1.5mm height stainless-steel cannula with a glass coverslip at  
394 the base) over CA1 (stereotaxic coordinates: AP=-2.0, ML=-2.0 from bregma). A 3mm craniotomy  
395 was drilled at these coordinates. The cortex was removed via aspiration to reveal the external  
396 capsule of the hippocampus. The cannula was inserted into the craniotomy and secured to the skull  
397 with dental cement. A metal head-plate was glued to the skull and secured with dental cement. The  
398 animal was left to recover for at least one week after surgery before diet restriction and habituation  
399 to head-fixation commenced.

400 Following a period of handling and habituation, the mouse was head-fixed above a styrofoam wheel  
401 and trained to run for reward through virtual reality environments, presented on 3 LCD screens that  
402 surrounded the animal. ViRMEn software (Aronov and Tank, 2014) was used to design and present  
403 the animal with virtual reality linear tracks. Movement of the animal on the wheel was recorded  
404 with a rotatory encoder and lead to corresponding translation through the virtual track. During the  
405 experimental phase of the training, the animal was trained to run down a 230cm linear track and  
406 was required to lick at a reward port at a fixed, unmarked goal location within the environment  
407 in order to trigger release of a drop of condensed milk. Licks were detected by an optical lick  
408 detector, with an IR LED and sensor positioned on either side of the animal's mouth. When the  
409 animal reached the end of the linear track, a black screen appeared for 2 seconds and the animal  
410 was presented with the beginning of the linear track, starting a new trial.

411 Imaging was conducted using a two-photon microscope (resonant scanning vivoscope, Scientifica)  
412 using 16x/0.8-NA water-immersion objective (Nikon). GCaMP was excited using a Ti:sapphire laser



413 (Mai Tai HP, Spectra-Physics), operated with an excitation wavelength of 940nm. ScanImage software  
414 was used for data collection / to interface with the microscope hardware. Frames were acquired at  
415 a rate of 30Hz.

416 The Suite2p toolbox (Pachitariu et al., 2017) was used to motion correct the raw imaging frames  
417 and extract regions of interest, putative cells.

#### 418 **Tetrode recordings from auditory cortex**

419 Sound-evoked neuronal responses were obtained via chronically-implanted electrodes in the right  
420 hemisphere auditory cortex of one 17-week-old male mouse (*M. musculus*, C57Bl/6, Charles River).  
421 All experimental procedures were carried out in accordance with the institutional animal welfare  
422 guidelines and a UK Home Office Project License approved under the United Kingdom Animals  
423 (Scientific Procedures) Act of 1986.

424 During recordings, the animal was allowed to freely move within a 11x21 cm cardboard enclosure,  
425 with one wall consisting of an acoustically-transparent mesh panel to allow unobstructed sound  
426 stimulation. Acoustic stimuli were delivered via two free-field electrostatic speakers (Tucker-Davis  
427 Technologies, FL, USA) placed at ear level, 7 cm from the edge of the enclosure. Recordings were  
428 performed inside a double-walled soundproof booth (IAC Acoustics), whose interior was covered  
429 by 4-cm thick acoustic absorption foam (E-foam, UK). Pure tones were generated using MATLAB  
430 (Matlab version R2015a; MathWorks, Natwick, MA, USA), and played via a digital signal processor  
431 (RX6, Tucker Davis Technologies, FL, USA). The frequency response of the loudspeaker was  $\pm 10$   
432 dB across the frequency range used for stimulation. Pure tones of a duration of 200ms (including  
433 5 ms linear rise and fall times) of variable frequencies (4-64 kHz in 0.1 octave increments) were  
434 used for stimulation. The tones were presented at 65dB SPL at the edge of the testing box. The  
435 41 frequencies were presented pseudo-randomly, separated by a randomly varying inter-stimulus  
436 interval ranging from 500 to 510ms, for a total of 20 repetitions.

437 Extracellular electrophysiological recordings were obtained using a custom chronically-implanted  
438 64-channel hyperdrive with two 32-channel Omnetics connectors (A79026-001) and 16 individually  
439 movable tetrodes (FlexDrive, (Voigts et al., 2013)). Tetrodes were made from 12.7  $\mu\text{m}$  tungsten wire  
440 (99.95%, HFV insulation, California Fine Wire, USA) gold-plated to reduce impedance to 200k $\Omega$  at  
441 1kHz (NanoZ, Multichannel Systems). Neuronal signals were collected and amplified using two  
442 32-channel amplifier boards (Intan RHD 2132 headstages) and an Open Ephys recording system  
443 (Siegle et al., 2017) at 30kHz.

#### 444 **Data Preprocessing**

445 Raw electrophysiological traces as well as calcium traces were transformed to a frequency repre-  
446 sentation using discrete-wavelet transformation (DWT). We decided to use wavelet transformation  
447 instead of windowed Fourier transform (WFT) as we expected a wide range of dominant frequencies  
448 in our signal for which the wavelet transformation is more appropriate (Torrence and Compo, 1998).  
449 For the wavelet transformation, we used the morlet wavelet:

$$\psi_0(\eta) = \pi^{-\frac{1}{4}} * \exp(i * \omega_0 * \eta) * \exp(-\eta^2/2) \quad (1)$$

450 with a non-dimensional frequency constant  $\omega_0 = 6$ . We noticed that downscaling the wavelets  
451 improved our model performance, prompting us to use an additional preprocessing step which  
452 effectively decreased the sampling rate of the wavelets to  $\psi_{SR_{after}} = \psi_{SR_{before}} / M$  by a factor of  $M$ . This

453 can also be seen as an additional convolutional layer with a kernel size of  $M$ , a stride of  $M$  and  
454 weights fixed to  $\frac{1}{M}$ . We performed a hyperparameter search for  $M$  with a simplified model and  
455 found the best performing model with  $M = 1000$ , thus effectively decreasing our sampling rate from  
456 30000 to 30 (Figure S7).

457 As additional preprocessing steps we applied channel and frequency wise normalization using a  
458 median absolute deviation (MAD) approach. We calculated the median and the corresponding  
459 median absolute deviation for each frequency and channel on the training set and normalized our  
460 inputs as follows:

$$X_{c,f} = \frac{X_{c,f} - \tilde{X}_{c,f}}{\text{median}(|X_{c,f} - \tilde{X}_{c,f}|)} \quad (2)$$

461 where  $\tilde{X}_i$  is the median of  $X_i$ . This approach turned out to be more robust against outliers in  
462 the signal than simple mean normalization. Additional min-max scaling did not further improve  
463 performance.

#### 464 **Bayesian decoder**

465 As a baseline model, we used a Bayesian decoder which was trained on manually sorted and  
466 clustered spikes. Given a time window  $T$  and number of spikes  $K = (k_1, \dots, k_N)$  fired by  $N$  place cells,  
467 we can calculate the probability  $P(K|x)$ , estimating the number of spikes  $K$  at location  $x$ :

$$P(K|x) = \prod_{i=1}^N \text{Poisson}(k_i, T\alpha_i(x)) = \prod_{i=1}^N \frac{(T\alpha_i(x))^{k_i}}{k_i!} \quad (3)$$

468 where  $\alpha_i(x)$  is the firing rate of cell  $i$  at position  $x$ . From this we can calculate the probability of the  
469 animals location given the observed spikes:

$$P(x|K) = P(x) \prod_{i=1}^N \alpha_i(x)^{k_i} \exp(-T \sum_{i=1}^N \alpha_i(x)) \quad (4)$$

470 where  $P(x)$  is the historic position of the animal which we use to constrain  $P(x|K)$  to provide a fair  
471 comparison to the convolutional decoder. The final estimate of position is based on the peak of  
472  $P(x|K)$ :

$$\hat{x} = \text{argmax}_x P(x|K) \quad (5)$$

473 We used the same cross-validation splits as for the convolutional model and calculated the Euclidean  
474 distance between the real and decoded position. We performed grid search on one representative  
475 rat to find the optimal parameters regarding bin size and bin length for the Bayesian decoder. The  
476 optimized Bayesian decoder uses a Gaussian smoothing kernel with sigma = 1.5, a bin size of 2cm  
477 for binning the ratemaps, and uses a bin length of 0.5s.

#### 478 **Convolutional neural network**

479 The model takes a three-dimensional wavelet transformed signal as input and uses convolutional  
480 layers connected to a regression head to decode continuous behaviour. We use a kernel size of  
481 3 throughout the model and keep the number of filters constant at 64 for the first 8 layers while

482 sharing the weights over the channel axis, while then doubling them for each following layer. For  
483 downsampling the input we use a stride of 2, intermixed between the time and frequency dimension  
484 (Table S1, Fig 1B). As regularization we apply gaussian noise  $\mathcal{N}(\mu, \sigma^2)$  with  $\mu = 0$  and  $\sigma = 1$  to each  
485 input sample.

486 We extensively investigated the use of a convolutional long-short-term-memory (LSTM) after the  
487 initial convolutions, where we used backpropagation through time on the time dimension. In a  
488 simplified model this led to a small decrease in decoding error for the model trained on position.  
489 We nevertheless decided to employ a model with only simple convolutions as one important aspect  
490 of this model is the simplicity of use for a neuroscientist. Moreover we experimented with using a  
491 wavenet (Oord et al., 2016) inspired model directly on the raw electrophysiological signal but noticed  
492 that the model using the wavelet transformed input outperformed the wavenet approach by a  
493 margin of around 20cm for the positional decoding. The wavenet inspired model was considerably  
494 slower to train and therefore a full hyperparameter search could not be performed.

495 Previous models contrasting recurrent vs. convolutional networks (Bai et al., 2018), find that  
496 convolutional layers outperform recurrent ones when trained directly on minimally processed  
497 data. The benchmarks typically used in classical sequence learning are one-dimensional, whereas  
498 we record two-dimensional raw input (time x channels) with a high sampling rate, complicating  
499 the amount of experimentation we could perform as the unprocessed data for a 2s time window  
500 exceeds the capacity of GPU memory (30000 x 128 time points per sample). In the related field of  
501 speech processing with sampling rates up to 48000Hz, the input is processed using log-mel feature  
502 banks which are computed with a 25ms window and a 10ms shift (Bahdanau et al., 2016; Chan et al.,  
503 2016; Prabhavalkar et al., 2017). We therefore opted for a similar approach by using downsampled  
504 wavelet transformed signals, resulting in a 33.3ms window given a downsampling size of  $z=1000$ .  
505 Note that with further downsampling there might be a risk of losing decoding precision, with some  
506 of the behaviours coming close to the downsampled rate (e.g. head direction can be up to 40deg/s)  
507 (Figure S7).

## 508 **Model training**

509 The model takes as input a three-dimensional wavelet transformed signal corresponding to time,  
510 frequency and channels, with frequencies logarithmically scaled between 0Hz-15000Hz. An optimal  
511 temporal window of  $T=64$  (corresponding to 2.13s) was established by hyperparameter search  
512 taking into account the tradeoff between speed of training and model error. For training the model  
513 across the full duration of the experiment we divided the experiment into 5 partitions and used  
514 cross-validation for testing the model on before unseen data partitions, i.e. we first used partitions  
515 2 to 5 for training and 1 for testing, then 1,3,4 and 5 for training and 2 for testing and so on. The  
516 last partition uses 1 to 4 for training and 5 for testing. Importantly, the overlap introduced by using  
517 2s long samples was accounted for by using gaps (2s) between the training partitions, making sure  
518 that training and test set are fully independent of each other. We then randomly sampled inputs  
519 and outputs from the training set. Each input had corresponding outputs for the position (X, Y  
520 in cm), head direction (in radians) and speed (in cm/s). We used Adam as our learning algorithm  
521 with a learning rate of 0.0007 and stopped training after we sampled 18000 samples, divided into  
522 150 batches for 15 epochs, each batch consisting of 8 samples. During training we multiplied the  
523 learning rate by 0.2 if validation performance did not improve for 3 epochs. We performed random  
524 hyperparameter search for the following parameters: learning rate, dropout, number of units  
525 in the fully connected layer and number of input timesteps. For calculating the chance level we  
526 used a shuffling procedure in which the wavelet transformed electrophysiological signal is shifted

527 relative to its corresponding position. After shuffling we trained the model with the same setting as  
528 the unshuffled model and for the same number of epochs. The training was performed on one  
529 GTX1060 using Keras with Tensorflow as backend.

### 530 **Model comparison**

531 In order to compare the performance of the network against the Bayesian decoder we simulated  
532 both models in a setting with artificially reduced inputs. We used 1 to 32 tetrodes as input for both  
533 decoders, with tetrodes taken top to bottom in order of the given tetrode number. The input of  
534 run 1 was then comprised of tetrodes 1 to 32, while run 2 used tetrodes 1 to 31. The last run uses  
535 only the first tetrode as input to both models. We then retrained both models with the artificially  
536 reduced number of tetrodes making sure both models have the same cross-validation splits and  
537 report decoding errors as the average of each cross-validation split.

### 538 **Model evaluation**

539 For adjusting the model weights during training we use different loss terms depending on the  
540 behaviour or stimuli which we decode.

$$\mathcal{L}_{ED} = \sqrt{\sum_{i=1}^M (\hat{y}_i - y_i)^2} \quad \mathcal{L}_{MAE} = \frac{1}{M} \sum_{i=1}^M |\hat{y}_i - y_i| \quad \mathcal{L}_{CMAE} = \min[|\hat{y}_i - y_i|, |\hat{y}_i - y_i| + \pi, |\hat{y}_i - y_i| - \pi] \quad (6)$$

541 For decoding of position from tetrode CA1 recordings we try to minimize the Euclidean loss between  
542 predicted and ground truth position ( $\mathcal{L}_{ED}$ ). We use the mean squared error for the decoding of  
543 speed ( $\mathcal{L}_{MAE}$ ) and the cyclical absolute error for decoding of head direction ( $\mathcal{L}_{CMAE}$ ). For all other  
544 behaviours or stimuli we use  $\mathcal{L}_{MAE}$  as the default optimizer.

545 We decided to use  $R^2$  scores to measure model performance across different behaviours, brain  
546 areas and recording techniques. We use the formulation of fraction of variance accounted for (FVAF)  
547 instead of the squared Pearson's correlation coefficient. Both terms are based on the fraction of  
548 the residual sum of squares and the total sum of squares:

$$R^2 = 1 - \frac{\sum_{i=1}^M (y_i - \alpha \hat{y}_i - \beta)^2}{\sum_{i=1}^M (y_i - \bar{y})^2} \quad (7)$$

549 with  $y_i$  the ground truth of sample  $i$ ,  $\hat{y}_i$  the predicted value and  $\bar{y}$  the mean value. Here, Pearson's  
550 correlation coefficient tries to maximize  $R^2$  by adjusting  $\alpha$  and  $\beta$  while FVAF uses  $\alpha = 1$  and  $\beta = 0$   
551 (Fagg et al., 2009). This provides a more conservative measure of performance as FVAF requires  
552 that prediction and ground truth fit without scaling the predicted values. FVAF in turn has no lower  
553 bound as the prediction can be arbitrarily worse with a given scaling constant (i.e. given a ground  
554 truth value of 10, a prediction of 1000 has a lower (worse)  $R^2$  score than a prediction of 100).

### 555 **Influence maps**

556 To investigate which frequencies, channels or timepoints were informative for the respective  
557 decoding we performed a bootstrapping procedure after training the models. For each sample in  
558 time we calculated the real decoding error  $e_o$  for each behaviour by using the wavelets as input. We  
559 then shuffle the wavelets for a particular frequency and re-calculate the error. We then define the  
560 influence of a given frequency or channel as the relative change:  $\frac{e_s - e_o}{e_o}$  where  $e_o$  is the original error  
561 and  $e_s$  the shuffled error. We repeat this for the channel and time dimension to get an estimate of  
562 how much influence each channel or timepoint has on the decoding of a given behaviour.

563 We also tried calculating sample gradients with respect to our inputs (Simonyan et al., 2013). For  
564 this we calculated the derivative  $w$  by back-propagation for each sample and with respect to the  
565 inputs. In contrast to class saliency maps, we obtain a gradient estimate indicating how much each  
566 part of the input strongly drives the regression output. We calculate saliency maps for each sample  
567 cross-validated over the entire experiment. For deriving influence maps from the raw gradients we  
568 calculate the variance across the time dimension and use this as an estimate of how much influence  
569 each frequency band or channel has on the decoding. This method however introduces a lot of  
570 high-frequency noise in the gradients, possibly coming from the strides in the convolutional layers  
571 used throughout the model (Olah et al., 2017).



## 572 AUTHOR CONTRIBUTIONS

573 CB, JK initial idea for project, MF conceived the network architecture and implemented all neural network models, CB implemented the  
574 Bayesian decoder, ST spike sorted the data and classified neurons, ST, CP, AL acquired data with help from DB, MF, ST, CB, MN, AB, JK,  
575 CFD contributed ideas to experiments and analysis, MF, CB wrote the paper with input from all authors.

576 MF and CFD are supported by the European Research Council (ERC-CoG GEOCOG 724836); CFD's research is also funded by the  
577 Max Planck Society; the Kavli Foundation; the Centre of Excellence scheme of the Research Council of Norway – Centre for Neural  
578 Computation (223262/F50), The Egil and Pauline Braathen and Fred Kavli Centre for Cortical Microcircuits, and the National Infrastructure  
579 scheme of the Research Council of Norway – NORBRAIN (197467/F50); CB funded by Wellcome SRF (212281/Z/18/Z); CP funded by  
580 Wellcome Trust (110238/Z/15/Z).

## 581 DATA AVAILABILITY

582 All datasets used in this study will be made public upon publication.

## 583 CODE AVAILABILITY

584 The code is available at <https://github.com/CYHSM/DeepInsight>

## 585 REFERENCES

- 586 David H. Hubel and Torsten N. Wiesel. Receptive fields of single neurones in the cat's striate cortex. *The Journal of Physiology*, 148(3):  
587 574–591, 1959.
- 588 John O'Keefe and Jonathan Dostrovsky. The hippocampus as a spatial map. Preliminary evidence from unit activity in the freely-moving  
589 rat. *Brain Research*, 34(1):171–175, November 1971.
- 590 Kerry MM Walker, Jennifer K. Bizley, Andrew J. King, and Jan WH Schnupp. Multiplexed and robust representations of sound features in  
591 auditory cortex. *Journal of Neuroscience*, 31(41):14565–14576, 2011.
- 592 Francesca Sargolini, Marianne Fyhn, Torkel Hafting, Bruce L. McNaughton, Menno P. Witter, May-Britt Moser, and Edvard I. Moser.  
593 Conjunctive Representation of Position, Direction, and Velocity in Entorhinal Cortex. *Science*, 312(5774):758–762, May 2006.
- 594 Emilio Kropff, James E. Carmichael, May-Britt Moser, and Edvard I. Moser. Speed cells in the medial entorhinal cortex. *Nature*, 523  
595 (7561):419–424, July 2015. Number: 7561 Publisher: Nature Publishing Group.
- 596 Torkel Hafting, Marianne Fyhn, Sturla Molden, May-Britt Moser, and Edvard I. Moser. Microstructure of a spatial map in the entorhinal  
597 cortex. *Nature*, 436(7052):801–806, August 2005.
- 598 Kiah Hardcastle, Niru Maheswaranathan, Surya Ganguli, and Lisa M. Giocomo. A Multiplexed, Heterogeneous, and Adaptive Code for  
599 Navigation in Medial Entorhinal Cortex. *Neuron*, 94(2):375–387.e7, April 2017.
- 600 Willard L. McFarland, Herman Teitelbaum, and Elizabeth K. Hedges. Relationship between hippocampal theta activity and running  
601 speed in the rat. *Journal of Comparative and Physiological Psychology*, 88(1):324–328, 1975.
- 602 John O'Keefe and Michael L. Recce. Phase relationship between hippocampal place units and the EEG theta rhythm. *Hippocampus*, 3(3):  
603 317–330, 1993.
- 604 Robert U. Muller, John L. Kubie, and James B. Ranck. Spatial firing patterns of hippocampal complex-spike cells in a fixed environment.  
605 *Journal of Neuroscience*, 7(7):1935–1950, 1987.
- 606 Greg S. Corrado, Leo P. Sugrue, H. Sebastian Seung, and William T. Newsome. Linear-Nonlinear-Poisson Mod-  
607 els of Primate Choice Dynamics. *Journal of the Experimental Analysis of Behavior*, 84(3):581–617, 2005. \_eprint:  
608 <https://onlinelibrary.wiley.com/doi/pdf/10.1901/jeab.2005.23-05>.
- 609 Alex Krizhevsky, Ilya Sutskever, and Geoffrey E. Hinton. ImageNet Classification with Deep Convolutional Neural Networks. In *Proceedings*  
610 *of the 25th International Conference on Neural Information Processing Systems - Volume 1*, NIPS'12, pages 1097–1105, USA, 2012. Curran  
611 Associates Inc. event-place: Lake Tahoe, Nevada.
- 612 Volodymyr Mnih, Koray Kavukcuoglu, David Silver, Andrei A. Rusu, Joel Veness, Marc G. Bellemare, Alex Graves, Martin Riedmiller,  
613 Andreas K. Fidjeland, Georg Ostrovski, Stig Petersen, Charles Beattie, Amir Sadik, Ioannis Antonoglou, Helen King, Dharshan  
614 Kumaran, Daan Wierstra, Shane Legg, and Demis Hassabis. Human-level control through deep reinforcement learning. *Nature*, 518  
615 (7540):529–533, February 2015.
- 616 Joshua I. Glaser, Raeed H. Chowdhury, Matthew G. Perich, Lee E. Miller, and Konrad P. Kording. Machine learning for neural decoding.  
617 *arXiv:1708.00909 [cs, q-bio, stat]*, August 2017. arXiv: 1708.00909.

- 618 Ardi Tampuu, Tambet Matiisen, Hauður Freyja Ólafsdóttir, Caswell Barry, and Raul Vicente. Efficient neural decoding of self-location  
619 with a deep recurrent network. *bioRxiv*, January 2018.
- 620 Radoslaw M. Cichy and Daniel Kaiser. Deep Neural Networks as Scientific Models. *Trends in Cognitive Sciences*, 23(4):305–317, April 2019.
- 621 Uri Hasson, Samuel A. Nastase, and Ariel Goldstein. Direct Fit to Nature: An Evolutionary Perspective on Biological and Artificial Neural  
622 Networks. *Neuron*, 105(3):416–434, February 2020.
- 623 Nick Cammarata, Shan Carter, Gabriel Goh, Chris Olah, Michael Petrov, and Ludwig Schubert. Thread: Circuits. *Distill*, 5(3):e24, March  
624 2020.
- 625 Yann LeCun, Yoshua Bengio, and Geoffrey Hinton. Deep learning. *Nature*, 521(7553):436–444, May 2015.
- 626 John O'Keefe and Lynn Nadel. *The hippocampus as a cognitive map*. Oxford: Clarendon Press, 1978.
- 627 Jérôme Epsztein, Michael Brecht, and Albert K. Lee. Intracellular Determinants of Hippocampal CA1 Place and Silent Cell Activity in a  
628 Novel Environment. *Neuron*, 70(1):109–120, April 2011.
- 629 Ali Jeewajee, Caswell Barry, John O'Keefe, and Neil Burgess. Grid cells and theta as oscillatory interference: Electrophysiological data  
630 from freely-moving rats. *Hippocampus*, 18(12):1175, 2008.
- 631 Christoph Stosiek, Olga Garaschuk, Knut Holthoff, and Arthur Konnerth. In vivo two-photon calcium imaging of neuronal networks.  
632 *Proceedings of the National Academy of Sciences*, 100(12):7319–7324, June 2003.
- 633 Kechen Zhang, Iris Ginzburg, Bruce L. McNaughton, and Terrence J. Sejnowski. Interpreting Neuronal Population Activity by Recon-  
634 struction: Unified Framework With Application to Hippocampal Place Cells. *Journal of Neurophysiology*, 79(2):1017–1044, February  
635 1998.
- 636 Marius Pachitariu, Nicholas Steinmetz, Shabnam Kadir, Matteo Carandini, and Harris Kenneth D. Kilosort: realtime spike-sorting for  
637 extracellular electrophysiology with hundreds of channels. *bioRxiv*, page 061481, June 2016.
- 638 Jason E. Chung, Jeremy F. Magland, Alex H. Barnett, Vanessa M. Tolosa, Angela C. Tooker, Kye Y. Lee, Kedar G. Shah, Sarah H. Felix,  
639 Loren M. Frank, and Leslie F. Greengard. A Fully Automated Approach to Spike Sorting. *Neuron*, 95(6):1381–1394.e6, September  
640 2017.
- 641 Jin Hyung Lee, David E. Carlson, Hooshmand Shokri Razaghi, Weichi Yao, Georges Goetz, Espen Hagen, Eleanor Batty, E. J. Chichilnisky,  
642 Gaute T. Einevoll, and Liam Paninski. YASS: Yet Another Spike Sorter. In *NIPS*, 2017.
- 643 Kenneth D. Harris, Darrell A. Henze, Jozsef Csicsvari, Hajime Hirase, and György Buzsáki. Accuracy of Tetrode Spike Separation as  
644 Determined by Simultaneous Intracellular and Extracellular Measurements. *Journal of Neurophysiology*, 84(1):401–414, July 2000.
- 645 Frank Wood, Michael J. Black, Carlos Vargas-Irwin, Matthew Fellows, and John P. Donoghue. On the variability of manual spike sorting.  
646 *IEEE Transactions on Biomedical Engineering*, 51(6):912–918, 2004.
- 647 Fabian Kloosterman, Stuart P. Layton, Zhe Chen, and Matthew A. Wilson. Bayesian decoding using unsorted spikes in the rat  
648 hippocampus. *Journal of Neurophysiology*, 111(1):217–227, October 2013. Publisher: American Physiological Society.
- 649 Etienne Ackermann, Caleb T. Kemere, and John P. Cunningham. Unsupervised Clusterless Decoding using a Switching Poisson Hidden  
650 Markov Model. *bioRxiv*, page 760470, September 2019. Publisher: Cold Spring Harbor Laboratory Section: New Results.
- 651 Xinyi Deng, Daniel F. Liu, Kenneth Kay, Loren M. Frank, and Uri T. Eden. Clusterless Decoding of Position From Multiunit Activity Using A  
652 Marked Point Process Filter. *Neural computation*, 27(7):1438–1460, July 2015.
- 653 Sergey D Stavisky, Jonathan C Kao, Paul Nuyujukian, Stephen I Ryu, and Krishna V Shenoy. A high performing brain-machine interface  
654 driven by low-frequency local field potentials alone and together with spikes. *Journal of Neural Engineering*, 12(3):036009, June 2015.
- 655 Christopher Torrence and Gilbert P. Compo. A Practical Guide to Wavelet Analysis. *Bulletin of the American Meteorological Society*, 79(1):  
656 61–78, January 1998.
- 657 H Freyja Ólafsdóttir, Caswell Barry, Aman B Saleem, Demis Hassabis, and Hugo J Spiers. Hippocampal place cells construct reward  
658 related sequences through unexplored space. *eLife*, 4:e06063, June 2015.
- 659 Gautam Agarwal, Ian H. Stevenson, Antal Berényi, Kenji Mizuseki, György Buzsáki, and Friedrich T. Sommer. Spatially distributed local  
660 fields in the hippocampus encode rat position. *Science*, 344(6184):626–630, 2014.
- 661 Pablo Jercog, Search Results Web results Yashar Ahmadian, Chris Woodruff, Rajeev Deb-Sen, Larry F. Abbott, and Eric R. Kandel. Heading  
662 direction with respect to a reference point modulates place-cell activity. *Nature Communications*, 10(1):1–8, May 2019.
- 663 Doreswamy Yoganarasimha, Xintian Yu, and James J. Knierim. Head Direction Cell Representations Maintain Internal Coherence during  
664 Conflicting Proximal and Distal Cue Rotations: Comparison with Hippocampal Place Cells. *The Journal of Neuroscience*, 26(2):622–631,  
665 January 2006.
- 666 Thomas Klausberger, Peter J. Magill, László F. Márton, J. David B. Roberts, Philip M. Cobden, György Buzsáki, and Peter Somogyi.  
667 Brain-state- and cell-type-specific firing of hippocampal interneurons in vivo. *Nature*, 421(6925):844–848, February 2003. Number:  
668 6925 Publisher: Nature Publishing Group.
- 669 Jozsef Csicsvari, Hajime Hirase, András Czurkó, Akira Mamiya, and György Buzsáki. Oscillatory Coupling of Hippocampal Pyramidal Cells  
670 and Interneurons in the Behaving Rat. *The Journal of Neuroscience*, 19(1):274–287, January 1999.

- 671 Daniel Fine English, Sam McKenzie, Talfan Evans, Kanghwan Kim, Euisik Yoon, and György Buzsáki. Pyramidal Cell-Interneuron Circuit  
672 Architecture and Dynamics in Hippocampal Networks. *Neuron*, 96(2):505–520.e7, October 2017.
- 673 W. Bryan Wilent and Douglas A. Nitz. Discrete place fields of hippocampal formation interneurons. *Journal of Neurophysiology*, 97(6):  
674 4152–4161, June 2007.
- 675 Robert U. Muller, Elizabeth Bostock, Jeffrey S. Taube, and John L. Kubie. On the directional firing properties of hippocampal place cells.  
676 *Journal of Neuroscience*, 14(12):7235–7251, 1994.
- 677 Alon Rubin, Michael M. Yartsev, and Nachum Ulanovsky. Encoding of Head Direction by Hippocampal Place Cells in Bats. *The Journal of*  
678 *Neuroscience*, 34(3):1067, January 2014.
- 679 Patricia Preston-Ferrer, Stefano Coletta, Markus Frey, and Andrea Burgalossi. Anatomical organization of presubicular head-direction  
680 circuits. *eLife*, 5:e14592, June 2016.
- 681 Christian F. Doeller, Caswell Barry, and Neil Burgess. Evidence for grid cells in a human memory network. *Nature*, 463(7281):657–661,  
682 February 2010.
- 683 Zé Henrique T. D. Góis and Adriano B. L. Tort. Characterizing Speed Cells in the Rat Hippocampus. *Cell Reports*, 25(7):1872–1884.e4,  
684 November 2018.
- 685 Carey Y. L. Huh, Bénédicte Amilhon, Katie A. Ferguson, Frédéric Manseau, Susana G. Torres-Platas, John P. Peach, Stephanie Scodras,  
686 Naguib Mechawar, Frances K. Skinner, and Sylvain Williams. Excitatory Inputs Determine Phase-Locking Strength and Spike-Timing  
687 of CA1 Stratum Oriens/Alveus Parvalbumin and Somatostatin Interneurons during Intrinsically Generated Hippocampal Theta  
688 Rhythm. *The Journal of Neuroscience: The Official Journal of the Society for Neuroscience*, 36(25):6605–6622, 2016.
- 689 Richard Kramis, Cornelius H. Vanderwolf, and Brian H. Bland. Two types of hippocampal rhythmical slow activity in both the rabbit and  
690 the rat: Relations to behavior and effects of atropine, diethyl ether, urethane, and pentobarbital. *Experimental Neurology*, 49(1):  
691 58–85, October 1975.
- 692 Robert S. Sainsbury, Arnold Heynen, and Christopher P. Montoya. Behavioral correlates of hippocampal type 2 theta in the rat.  
693 *Physiology & Behavior*, 39(4):513–519, January 1987.
- 694 Tsai-Wen Chen, Trevor J. Wardill, Yi Sun, Stefan R. Pulver, Sabine L. Renninger, Amy Baohan, Eric R. Schreiter, Rex A. Kerr, Michael B.  
695 Orger, Vivek Jayaraman, Loren L. Looger, Karel Svoboda, and Douglas S. Kim. Ultra-sensitive fluorescent proteins for imaging  
696 neuronal activity. *Nature*, 499(7458):295–300, July 2013.
- 697 Shaojie Bai, J. Zico Kolter, and Vladlen Koltun. An Empirical Evaluation of Generic Convolutional and Recurrent Networks for Sequence  
698 Modeling. *arXiv:1803.01271 [cs]*, April 2018. arXiv: 1803.01271.
- 699 Joshua H. Siegle, Aarón Cuevas López, Yogi A. Patel, Kirill Abramov, Shay Ohayon, and Jakob Voigts. Open Ephys: an open-source,  
700 plugin-based platform for multichannel electrophysiology. *Journal of Neural Engineering*, 14(4):045003, 2017.
- 701 Dmitry Aronov and David W. Tank. Engagement of neural circuits underlying 2D spatial navigation in a rodent virtual reality system.  
702 *Neuron*, 84(2):442–456, October 2014.
- 703 Marius Pachitariu, Carsen Stringer, Mario Dipoppa, Sylvia Schröder, L. Federico Rossi, Henry Dalglish, Matteo Carandini, and Kenneth D.  
704 Harris. Suite2p: beyond 10,000 neurons with standard two-photon microscopy. *bioRxiv*, page 061507, July 2017.
- 705 Jakob Voigts, Joshua H. Siegle, Dominique L. Pritchett, and Christopher I. Moore. The flexDrive: an ultra-light implant for optical control  
706 and highly parallel chronic recording of neuronal ensembles in freely moving mice. *Frontiers in Systems Neuroscience*, 7, 2013.
- 707 Aaron van den Oord, Sander Dieleman, Heiga Zen, Karen Simonyan, Oriol Vinyals, Alex Graves, Nal Kalchbrenner, Andrew Senior, and  
708 Koray Kavukcuoglu. WaveNet: A Generative Model for Raw Audio. *arXiv:1609.03499 [cs]*, September 2016. arXiv: 1609.03499.
- 709 Dzmitry Bahdanau, Jan Chorowski, Dmitry Serdyuk, Philemon Brakel, and Yoshua Bengio. End-to-End Attention-based Large Vocabulary  
710 Speech Recognition. *arXiv:1508.04395 [cs]*, March 2016. arXiv: 1508.04395.
- 711 William Chan, Navdeep Jaitly, Quoc Le, and Oriol Vinyals. Listen, attend and spell: A neural network for large vocabulary conversational  
712 speech recognition. In *2016 IEEE International Conference on Acoustics, Speech and Signal Processing (ICASSP)*, pages 4960–4964, March  
713 2016. ISSN: 2379-190X.
- 714 Rohit Prabhavalkar, Kanishka Rao, Tara N. Sainath, Bo Li, Leif Johnson, and Navdeep Jaitly. A Comparison of Sequence-to-Sequence  
715 Models for Speech Recognition. In *Interspeech 2017*, pages 939–943. ISCA, August 2017.
- 716 Andrew H. Fagg, Gregory W. Ojakangas, Lee E. Miller, and Nicholas G. Hatsopoulos. Kinetic Trajectory Decoding Using Motor Cortical  
717 Ensembles. *IEEE Transactions on Neural Systems and Rehabilitation Engineering*, 17(5):487–496, October 2009.
- 718 Karen Simonyan, Andrea Vedaldi, and Andrew Zisserman. Deep Inside Convolutional Networks: Visualising Image Classification Models  
719 and Saliency Maps. *arXiv:1312.6034 [cs]*, December 2013. arXiv: 1312.6034.
- 720 Chris Olah, Alexander Mordvintsev, and Ludwig Schubert. Feature Visualization. *Distill*, 2(11):e7, November 2017.

721 SUPPLEMENTARY MATERIAL

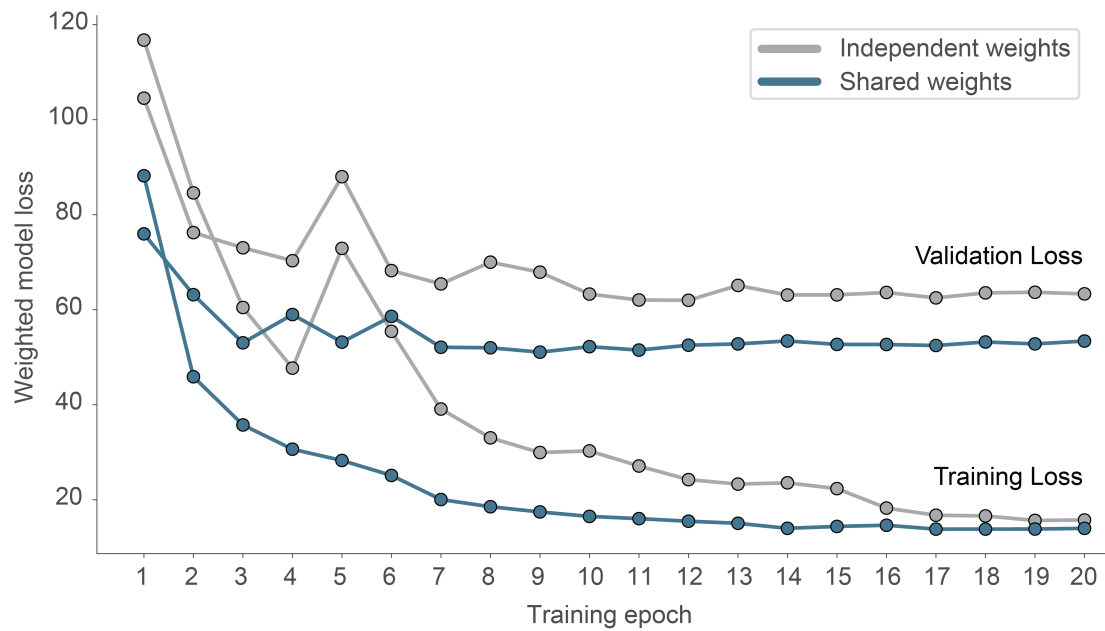

**Figure S1: Effect of weight sharing on model performance**

We evaluated two models on the same dataset, using either shared weights and 2D-convolutions (blue) or independent weights using 3D-convolutions (grey). The model using shared weights reaches a lower validation loss and generalizes better (smaller overfit).

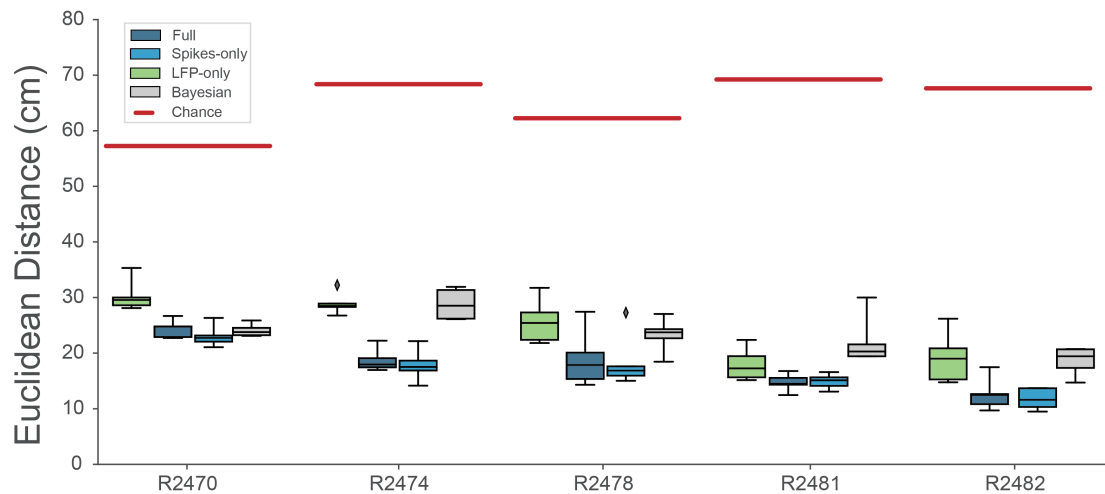

**Figure S2: Decoding performance across different models**

We calculated the Euclidean distance between the real behaviour and decoded behaviour across five rats and 4 different models. Full model has access to all frequency bands from 2-15000Hz, Spikes model has access to frequencies >250Hz, while LFP model uses frequencies <250Hz. Bayesian decoder was trained on spike sorted data. Chance level is indicated as red line.

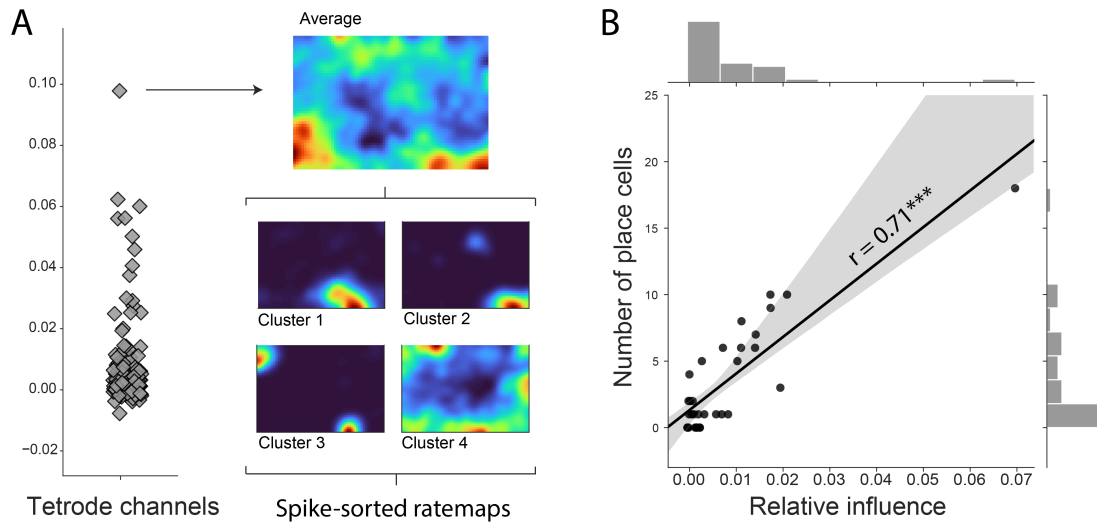

**Figure S3: Influence of decoding across channels**

(A) Channel influence scores for positional decoding (left). The most influential channel for the positional decoding has a high number of place cells (right). Average ratemap of all clusters (top,  $n=21$ ) and four example clusters (bottom) shown. (B) Influence scores per tetrode (average influence over 4 channels) highly correlates with number of place cells on the tetrode, indicating that the network is correctly identifying place cells as the spatially most informative neural correlate.

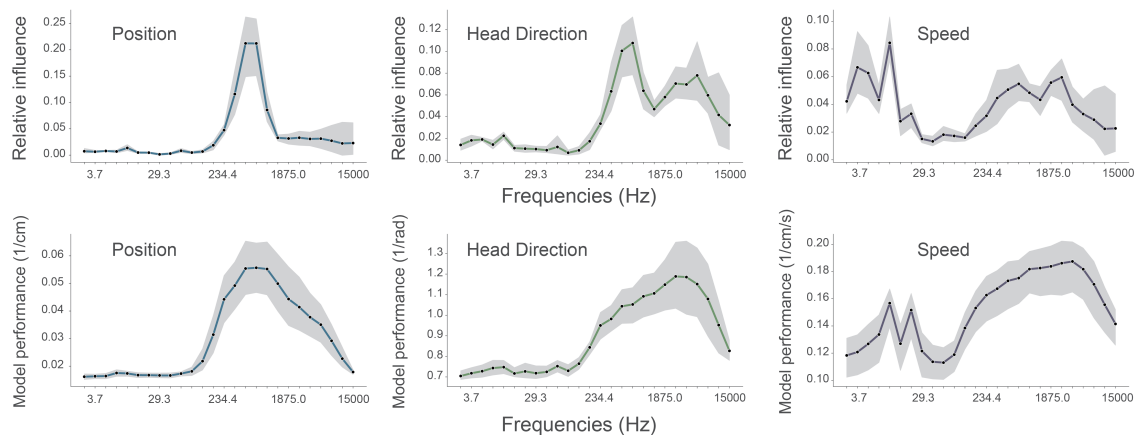

**Figure S4: Performance of standard model compared with models trained on single frequency bands.**

To determine if the frequencies identified as important by our complete model matched those that were most informative on their own, we compared the influence plots (top row, same as Figure 3A in manuscript) generated for the standard model with accuracy plots from models trained on individual frequency bands (bottom row). In all cases 128 channel recordings from rodent CA1 were used to decode position (left column), head direction (middle column), and speed (right column). Influence plots were constructed as before. Accuracy (bottom row) is simply defined as  $1/\text{decoding error}$  and is not normalised relative to chance or ceiling performance, values were generated using the same convolutional neural network while only providing a single frequency band for training and testing. Although influence is not expected to be a simple linear function of accuracy, the results from the two methods were highly correlated: position, Spearman's  $Rho=0.88$  ( $p<0.001$ ); head direction,  $Rho=0.82$  ( $p<0.001$ ); running speed,  $Rho=0.47$  ( $p=0.02$ ). For each frequency band we show the average cross-validation performance across five animals for three different behaviours and loss functions. Data from all animals, the shaded area indicates the 95% confidence interval.



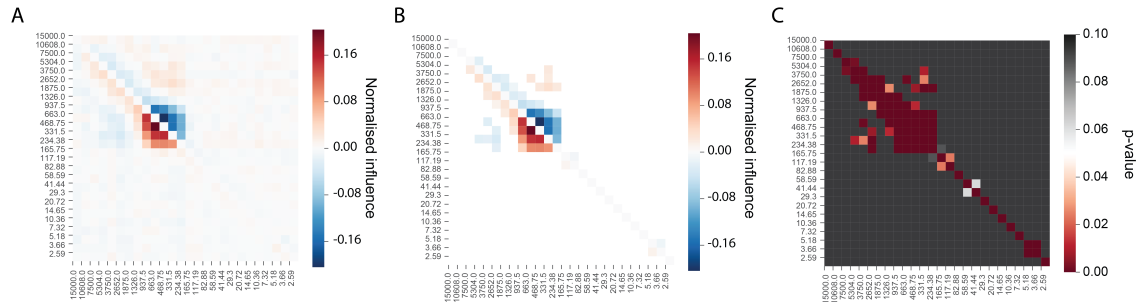

**Figure S5: A subset of frequency pairs exhibit greater than expected decoding influence** We evaluated 325 frequency pairs to investigate the relative influence of conjoint frequencies versus the sum of their individual influence on the decoding of position. (A) For each frequency pair the combined influence - calculated by shuffling both together ( $f_{xy}$ ) - is compared to the summed influence of each alone ( $f_x + f_y$ ). Lower triangle shows  $f_{xy} - (f_x + f_y)$ , upper triangle shows  $(f_x + f_y) - f_{xy}$ . Positive, red, entries in lower triangular indicate frequency pairs with a combined influence greater than the sum of their individual influences. (B) Same a left matrix with non-significant entries removed. (C) P values for the data in the left matrix determined using the Wilcoxon signed rank test, Holm-Sidak corrections were applied for  $n=325$  comparisons. There was a limited subset of frequency pairings in which the combinatorial influence on position decoding significantly exceeded the sum of individual frequencies - these were focused on the bands associated with place cell action potential (331.5Hz to 937.5Hz) and to a lesser extent on the ones associated with putative interneurons.

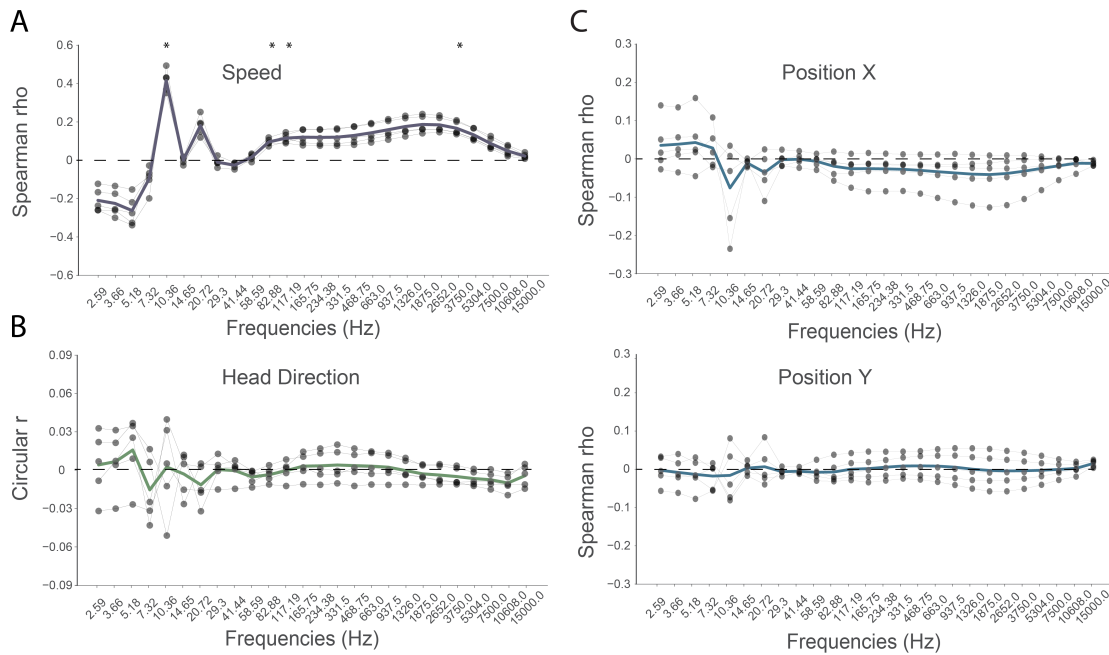

**Figure S6: Running speed linearly correlates with power in multiple frequency bands**

To identify simple relationships between behavioural variables and frequency bands we calculated the Spearman Rank Order Correlation Coefficient (speed and position) and Circular Correlation (head direction) between the wavelet transformed electrophysiological signal and the position, head direction and speed of the animal. (A) In the case of running speed, multiple frequency bands exhibited moderate correlations. In particular, as previously reported, the strongest relationship was present in the theta-band (10.36Hz,  $\rho = 0.415$ ), a relationship that was present in all five rats ( $p < 0.01$ ). (B,C) In contrast no such relationship was found for the other spatial variables. Indeed, the strongest correlation identified was a negative relationship between x-axis position and power in the theta-band (10.36Hz,  $\rho = -0.0759$ , but which was not significant,  $p = 0.9803$ ). Grey points indicate correlation for each animal ( $n=5$ ), bold line shows the mean of those.

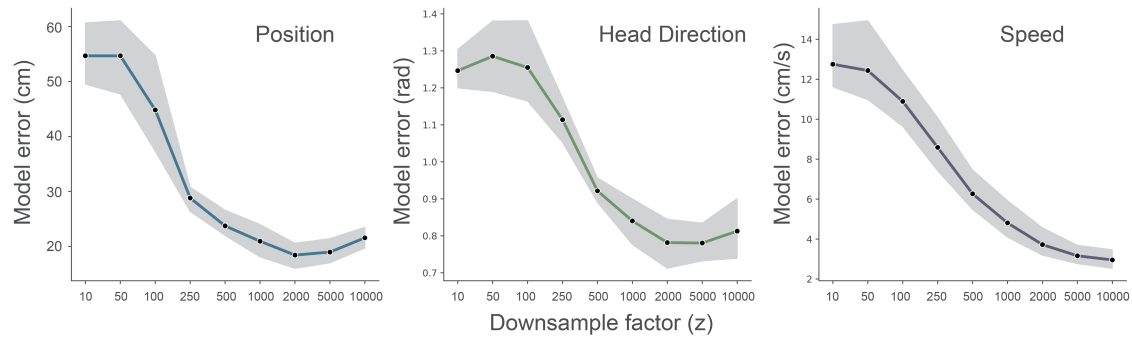

**Figure S7: Effect of downsampling on model performance**

We ran fully cross-validated experiments for different downsampling values of the wavelet transformed electrophysiological signal ( $z = [10...10000]$ ). Data from one animal (R2478), the shaded area indicates the 95% confidence interval.

| Layer | Layer Type       | Input Dimension | Kernel Size | Strides | Filters |
|-------|------------------|-----------------|-------------|---------|---------|
| 1     | 2D - Convolution | (64, 26, 128)   | (3,3)       | (2,1)   | 64      |
| 2     | 2D - Convolution | (32, 26, 128)   | (3,3)       | (1,2)   | 64      |
| 3     | 2D - Convolution | (32, 13, 128)   | (3,3)       | (2,1)   | 64      |
| 4     | 2D - Convolution | (16, 13, 128)   | (3,3)       | (1,2)   | 64      |
| 5     | 2D - Convolution | (16, 7, 128)    | (3,3)       | (2,1)   | 64      |
| 6     | 2D - Convolution | (8, 7, 128)     | (3,3)       | (1,2)   | 64      |
| 7     | 2D - Convolution | (8, 4, 128)     | (3,3)       | (2,1)   | 64      |
| 8     | 2D - Convolution | (4, 4, 128)     | (3,3)       | (1,2)   | 64      |
| 9     | 2D - Convolution | (4, 2, 128)     | (3,2)       | (1,2)   | 64      |
| 10    | 2D - Convolution | (4, 2, 64)      | (3,2)       | (1,2)   | 128     |
| 11    | 2D - Convolution | (4, 2, 32)      | (3,2)       | (1,2)   | 128     |
| 12    | 2D - Convolution | (4, 2, 16)      | (3,2)       | (1,2)   | 128     |
| 13    | 2D - Convolution | (4, 2, 8)       | (3,2)       | (1,2)   | 128     |
| 14    | 2D - Convolution | (4, 2, 4)       | (3,2)       | (1,2)   | 128     |
| 15    | 2D - Convolution | (4, 2, 2)       | (3,2)       | (1,2)   | 128     |
| 16    | Fully Connected  | (4, 512)        | -           | -       | 1024    |
| 17    | Fully Connected  | (4, )           | -           | -       | 2/1     |

**Table S1: Layer by layer architecture of the convolutional model**

Note that the first layers 1-8 share the weights over the channel dimension while layers 9-15 share the weights across the time dimension. Layers 9 to 15 depict the kernel sizes and strides for the tetrode recordings with 128 channels. For recordings with different number of channels we adjust the number of downsampling layers to match the dimension of layer 15. Order of dimensions: Time, Frequency, Channels.
